1 **Sex Differences in Pubertal Circadian and Ultradian Rhythmic Development Under Naturalistic Conditions**

2 Azure D. Grant<sup>a</sup>, Linda Wilbrecht<sup>a,b</sup>, Lance J. Kriegsfeld<sup>a,b,c,d</sup>

3 <sup>a</sup>The Helen Wills Neuroscience Institute, University of California, Berkeley, CA, 94720, United States; <sup>b</sup>Department of  
4 Psychology, University of California, Berkeley, CA, 94720, United States; <sup>c</sup>Department of Integrative Biology,  
5 University of California, Berkeley, CA, 94720, United States; <sup>d</sup>Graduate Group in Endocrinology, University of  
6 California, Berkeley, CA, 94720, United States

7 **Short Title:** Sex Differences in Pubertal Rhythmic Development in Naturalistic Conditions

8 **Key Words:** puberty, estrous, metabolism, signal processing, wavelet analysis, natural light

9 **Acknowledgements:** The authors would like to thank Andrew Ahn, Ronald Dahl, Frédéric Theunissen, and Albert  
10 Qü for their helpful feedback on methods. This work was supported by a Miller Professorship from the Miller  
11 Institute for Basic Research at UC Berkeley (LW), and by NIH Grant HD-050470 (LJK).

12 **Address Correspondence to:**

13 Lance J. Kriegsfeld, PhD  
14 Department of Psychology, Integrative Biology,  
15 Graduate Group in Endocrinology and  
16 The Helen Wills Neuroscience Institute  
17 2121 Berkeley Way West, University of California  
18 Berkeley, CA, 94720, United States  
19 e-mail: [kriegsfeld@berkeley.edu](mailto:kriegsfeld@berkeley.edu)  
20 Phone: 510-642-5148  
21 Fax: 510-642-5293

22 **Abstract**

23 Biological rhythms in core body temperature (CBT) provide informative markers of adolescent development under  
24 controlled laboratory conditions. However, it is unknown if these markers are preserved under more variable  
25 naturalistic conditions, and if CBT may therefore prove useful in a real-world setting. To evaluate this possibility, we  
26 examined fecal steroid concentrations and CBT rhythms from pre-adolescence (p26) through early adulthood (p76)  
27 in intact male and female rats under natural light and climate at the University of California, Berkeley Field Station.  
28 Despite greater environmental variability, CBT markers of pubertal onset and its rhythmic progression were  
29 comparable to those previously reported in laboratory conditions in female rats and extend actigraphy-based findings  
30 in males. Specifically, sex differences emerged in circadian rhythm (CR) power and temperature amplitude prior to  
31 pubertal onset and persisted into early adulthood, with females exhibiting elevated CBT and decreased CR power  
32 compared to males. Within-day (ultradian rhythm; UR) patterns also exhibited a pronounced sex difference associated  
33 with estrous cyclicity. Pubertal onset, defined by vaginal opening, preputial separation, and sex steroid  
34 concentrations, occurred later than previously reported under lab conditions for both sexes. Vaginal opening and  
35 increased fecal estradiol concentrations were closely tied to the commencement of 4-day oscillations in CBT and UR  
36 power in female rats. By contrast, preputial separation and the first rise in testosterone concentration were not  
37 associated with adolescent changes to CBT rhythms in male rats. Together, males and females exhibited unique  
38 temporal patterning of CBT and sex steroids across pubertal development, with tractable associations between  
39 hormonal concentrations, external development, and temporal structure in females. The preservation of these  
40 features outside the laboratory supports CBT as a strong candidate for translational pubertal monitoring under  
41 naturalistic conditions in females.

42

43

44

45

## 46 Introduction

47 Clinical or self-assessment(Elchuri and Momen, 2020) of pubertal status is typically conducted via observation of  
48 external characteristics (e.g., Tanner Scale, developed in the late 1960's)(Rueda-Quijano et al., 2019; Shirtcliff et al.,  
49 2009), menstrual cycle tracking in girls(Fowler et al., 2020), or costly hormone measurement(Klein et al., 2017). Today,  
50 relatively inexpensive wearable sensors can capture metrics that are closely influenced by reproductive hormones  
51 and metabolism, such as body temperature(Grant et al., 2020; Smarr et al., 2020). These sensors may provide a  
52 convenient method to monitor pubertal development in real-world settings. Such sensors, along with a database of  
53 normative changes, could provide non-invasive information about pubertal development to teens, families, or  
54 clinicians(Wartella et al., 2016). These investigations require years of future study, wider adoption of wearables by  
55 preteens and teens, and further development of regulatory standards for wearable companies and  
56 clinicians(Campbell-Page and Shaw-Ridley, 2013; Gear, 2014; Grant et al., 2019; Wartella et al., 2016). Although the  
57 value of identifying these features for pre-clinical and translational studies is evident, whether environmental  
58 variability masks the patterns identified under controlled laboratory conditions requires empirical investigation.

59 Biological rhythms in core body temperature (CBT) change markedly across adolescence in rodents, enabling  
60 unobtrusive monitoring of this trajectory in a laboratory setting(Grant et al., 2021; Hagenauer et al., 2011; Zuloaga et  
61 al., 2009). These rhythms are coupled across physiological systems(Goh et al., 2019; Grant et al., 2020, 2018; Mohawk  
62 et al., 2012) and at multiple timescales, including within-a-day (ultradian rhythms; URs)(Bourguignon, 1988) and daily  
63 (circadian rhythms; CRs)(Garcia et al., 2001; MacKinnon et al., 1978) in both sexes, and multi-day ovulatory cycles in  
64 females (ovulatory rhythms; ORs)(Vidal, 2017). Rhythmicity serves numerous functions, including coordination of  
65 reproductive development(Albertsson-Wikland et al., 1997; Ankarberg and Norjavaara, 1999; Hagenauer et al., 2011;  
66 Norjavaara et al., 1996) and synchronization of internal systems to variation in the environment(Daan and Slopsema,  
67 1978; Hoogenboom et al., 1984; Lewis and Curtis, 2016). Features of biological rhythmicity can provide clinically-  
68 relevant diagnostic information(Akin and Elstein, 1975; Bhavani et al., 2019; Grant et al., 2020; Smarr et al., 2020).  
69 We recently applied this approach to monitor female adolescent development in rats under controlled laboratory  
70 conditions(Grant et al., 2021). This strategy revealed rhythmic features CBT that can be used to track adolescent  
71 development, with CR power and CBT amplitude rising from early to mid-adolescence and stabilizing by early

72 adulthood. Such outputs were coordinated with changes in reproductive hormones, consistent with the established  
73 temperature-modulating effects of estrogen(Williams et al., 2010) and progesterone(Buxton and Atkinson, 1948).  
74 However, exposure to the greater spectro-temporal variability of natural light, temperature, humidity, and enriched  
75 sensory complexity of a naturalistic environment (Joyce et al., 2020; Stothard et al., 2017) may add ‘noise’ to these  
76 features, and affect pubertal timing and tempo. Although a great deal of research has focused on extreme  
77 environments (e.g., polar(Steiger et al., 2013)), temperate environments may reveal differences from laboratory-  
78 derived features. Mice and rats exposed to longer or variable day lengths, for example, exhibit delayed external  
79 markers of pubertal onset(Lafaille et al., 2015), more variable activity rhythms(Kim and Harrington, 2008; Meijer et  
80 al., 2010), and have altered weight gain trajectories(Brown-Douglas et al., 2004). In contrast, male Siberian hamsters  
81 (*Phodopus sungorus*) advance puberty in long day lengths(Park et al., 2003) to maximize reproductive success prior  
82 to winter. These changes suggest species-specific decoupling of maturation mechanisms that are coordinated under  
83 laboratory conditions and that may also decouple temperature features from sexual maturation (Silva and Domínguez,  
84 2020). Additionally, animals raised in naturalistic environments exhibit elevated steroid hormone  
85 concentrations(Woodruff et al., 2013, 2010), suggesting that the hormonal milieu influencing the adolescent  
86 trajectory may alter temperature rhythms relative to laboratory-based studies.

87 To assess the potential impact of these factors on CBT rhythmicity during adolescence, we examined reproductive  
88 hormones and CBT patterns in a naturalistic setting. As humans face a complex environment of combined artificial  
89 and natural stimuli, we chose to investigate animals housed at the Field Station (FS) in Berkeley, CA, which is an  
90 intermediate between laboratory and field conditions. This environment provides shelters open to natural changes in  
91 light, humidity, and temperature, as well as a social partner and standard laboratory housing and food. We  
92 hypothesized that the FS environment would result in higher and more variable sex steroid concentrations(Woodruff  
93 et al., 2013, 2010) and pubertal timing onset compared to previous reports in the laboratory environment(Grant et  
94 al., 2021). We also speculated that these changes would be mirrored in CR and UR patterns and temperature  
95 amplitude. Finally, we anticipated that reported features of adolescence would occur in males as well as females, with  
96 the exception of the emergence of patterns associated with the ovulatory cycle, and that males may exhibit the sex

97 difference of elevated ultradian power and decreased temperature, as previously reported (Zuloaga et al., 2009),  
98 compared to females.

## 99 **Materials and Methods**

100 *Animals.* Male and female Wistar rat breeders were purchased at 250 g and 300 g, respectively, from Charles River  
101 (Charles River, Wilmington, MA). Animals were bred at the FS and weaned at postnatal day 21 (p21), with a maximum  
102 of one pair of pups (one experimental and one partner pup) in each experimental group, per litter. Weanlings were  
103 housed in same-sex pairs to minimize social isolation stress known to affect pubertal development (Bakshi and Geyer,  
104 1999; Boggiano et al., 2008) in standard translucent polypropylene (96 x 54 x 40 cm) rodent cages, and provided *ad libitum*  
105 access to food and water, wood chips for floor cover, bedding material, and chew toys for the duration of the study.  
106 Animals were gently handled daily before weighing to minimize stress. To prevent mixing of feces collected, cage  
107 mates were separated by a flexible stainless-steel lattice that permitted aural, scent, and touch interaction between  
108 siblings. A total of 16 animals were included in the study (n=8 per sex), with 16 same-sex individuals as social,  
109 littermate partners. The experiment was conducted in rooms with natural light (light intensity during the mean photo-  
110 and scotophases were  $677 \pm 254$  and  $2.65 \pm 0.40$  lux, respectively), outdoor ambient temperatures averaging  $22.6 \pm$   
111  $0.34^\circ$  C, and air circulation from August 9<sup>th</sup> to September 29<sup>th</sup>, 2019, at the Field Station at the University of California,  
112 Berkeley. All procedures were approved by the Institutional Animal Care and Use Committee of the University of  
113 California, Berkeley and conformed to the principles in the Guide for the Care and Use of Laboratory Animals, 8<sup>th</sup> ed.  
114 *Core Body Temperature Data Collection.* Data were gathered with G2 E-Mitter implants that chronically record CBT  
115 (Starr Life Sciences Co., Oakmont, PA). At weaning, G2 E-Mitters were implanted in the intraperitoneal cavity under  
116 isoflurane anesthesia, with analgesia achieved by subcutaneous injections of 0.03 mg/kg buprenorphine (Hospira,  
117 Lake Forest, IL) in saline. Buprenorphine was administered every 12 h for 2 days following surgery. E-Mitters were  
118 sutured to the ventral muscle wall to maintain consistent core temperature measurements. Recordings began  
119 immediately, but data collected for the first 5 days post-surgery were not included in analyses to allow for post-  
120 surgical recovery. Recordings were continuous and stored in 1-min bins.

121 *Fecal Sample Collection.* Fecal E2 (fE2) concentrations in females, and fecal testosterone (fT) concentrations in males,  
122 were assessed across puberty from feces generated over 24 h periods. Feces provide a more representative sample  
123 of average daily hormone concentrations than do blood samples(Auer et al., 2020; Harper and Austad, 2000;  
124 Millsbaugh and Washburn, 2003; Touma et al., 2004; Woodruff et al., 2010) and are non-invasively generated, thereby  
125 reducing stress associated with high-frequency, longitudinal blood collection. Samples were collected in small, airtight  
126 bags in the early mornings from p25 to p37 (pre puberty and first estrous cycle), p45 to p51 (mid puberty), and p55  
127 to p65 (late puberty to early adulthood) in females, and every 3 days in males from p25 to p74. Samples soiled with  
128 urine were discarded and all other boli generated over each 24-h segment were combined. Samples were stored at -  
129 20° C within 1 h of collection until preprocessing for the ELISA assay. Sample collection took ~ 1 min per animal. One  
130 female's samples were frequently soiled with urine and were therefore not included in analyses of 12 out of 24 of  
131 collected timepoints.

132 Samples were processed according to manufacturer's instructions (Arbor Assays, Ann Arbor, MI.). Briefly, samples  
133 were placed in a tin weigh boat and heated at 65°C for 90 minutes, until completely dry. Dry samples were ground to  
134 a fine powder in a coffee grinder, which was wiped down with ethanol and dried between samples to avoid cross  
135 contamination. Powder was weighed into 0.2 mg aliquots and added to 2 mL test tubes. For hormone extraction,  
136 1.8mL of 100% ethanol was added to each test tube, and tubes were shaken vigorously for 30 minutes. Tubes were  
137 then centrifuged at 5,000 RPM for 15 minutes at 4°C. Supernatant was moved to a new tube and evaporated under  
138 65°C until dry (~ 90 minutes). Sample residue was reconstituted in 100µL of 100% ethanol. 25µL of this solution was  
139 diluted for use in the assay and remaining sample was diluted and stored.

140 *Hormone Assessment.* A commercially available fE2 enzyme-linked immunosorbent assay (ELISA) kit was used to  
141 quantify E2 in fecal samples (Arbor Assays, Ann Arbor, MI). These assays have been previously published in species  
142 ranging from rats and mice(Asimes et al., 2018; Auer et al., 2020; Kalliokoski et al., 2015; Lv et al., 2020; Mathew et  
143 al., 2017; Steadman, 2019; Steadman et al., 2019), to wolves(Franklin et al., 2020), to humans(Righetti et al., 2020).  
144 ELISAs were conducted according to the manufacturer's instructions. To ensure each sample contained ≤ 5% alcohol,  
145 25µL of concentrate were vortexed in 475µL Assay Buffer. All samples were run in duplicate, and an inter-assay  
146 control was run with each plate. Sensitivity for the estradiol assay was 39.6 pg/mL and the limit of detection was 26.5

147 pg/mL. Sensitivity for the testosterone assay was 9.92 pg/mL and the limit of detection was 30.6 pg/mL. Fecal  
148 testosterone intra-assay coefficient of variation (C.V.) was 9.35% and inter-assay C.V. was 10.5%. Fecal estradiol intra-  
149 assay CV was 5.0% and inter-assay CV was 5.54%.

150 *Data Availability and Analysis.* All code and data used in this paper are available at A.G.'s and L.K.'s  
151 Github([azuredominique, 2021](#); [Kriegsfeld-Lab, 2021](#)). Code was written in MATLAB 2020b and 2021a with Wavelet  
152 Transform (WT) code modified from the Jlab toolbox and from Dr. Tanya Leise([Leise, 2015, 2013](#)). Briefly, data were  
153 imported to MATLAB at 1-minute resolution. Any data points outside  $\pm 3$  standard deviations were set to the median  
154 value of the prior hour, and any points showing near instantaneous change, as defined by  $\text{local abs}(\text{derivative}) > 10^5$   
155 as an arbitrary cutoff, were also set to the median value of the previous hour. Small data interrupts resulting from  
156 intermittent data pulls (<10 minutes) were linearly interpolated. Continuous data from p26 to p74 were divided into  
157 three equal-length phases: pre to mid puberty (p26 to p41), mid to late puberty (p42 to p58), and late puberty to early  
158 adulthood (p59 to p74).

159 *Wavelet Analyses and Statistics of CBT Data.* Briefly, Wavelet Transformation (WT) was used to generate a power  
160 estimate, representing amplitude and stability of oscillation at a given periodicity, within a signal at each moment in  
161 time. Whereas Fourier transforms allow transformation of a signal into frequency space without temporal position  
162 (i.e., using sine wave components of infinite length), wavelets are constructed with amplitude diminishing to 0 in both  
163 directions from center. This property permits frequency strength calculation at a given position. In the present  
164 analyses we use a Morse wavelet with a low number of oscillations (defined by  $\beta=5$  and  $\gamma=3$ , the frequencies of the  
165 two waves superimposed to create the wavelet([Lilly and Olhede, 2012](#))), similar to wavelets used in many circadian  
166 and ultradian applications([Grant et al., 2020](#); [Leise, 2015, 2013](#); [Lilly and Olhede, 2012](#); [Smarr et al., 2017, 2016](#)).  
167 Additional values of  $\beta$  (3–8) and  $\gamma$  (2–5) did not alter the findings. As WTs exhibit artifacts at the edges of the data  
168 being transformed, only the WT of the second through the second to last days of data were analyzed further, from  
169 p26 to p74. Periods of 1 to 39 h were assessed. For quantification of spectral differences, WT spectra were isolated in  
170 bands; circadian periodicity power was defined as the max power per minute within the 23 to 25 h band, and ultradian  
171 periodicity power was defined as the max power per minute in the 1 to 3 h band. The latter band was chosen because

172 this band corresponded with the daily ultradian peak power observed in ultradian rhythms across physiological  
173 systems in rats (de Kloet and Sarabdjitsingh, 2008; Grant et al., 2018; Kottler et al., 1989; Sanchez-Alavez et al., 2010).  
174 For statistical comparisons of any two groups, Mann Whitney U (MW) rank sum tests were used to avoid assumptions  
175 of normality for any distribution. Non-parametric Kruskal-Wallis tests were used instead of ANOVAs for the same  
176 reason; for all Kruskal-Wallis tests,  $\chi^2$  and  $p$  values are listed in the text. All relevant comparisons have the  
177 same  $n$ /group, and thus the same degrees of freedom. Mann Kendall (MK) tests were used to assess trends over time  
178 in wavelet power (**Figure 2**) and linear CBT (**Figure 4**) over three equally sized temporal windows, described above.  
179 For short term (< 3 days of data) statistical comparisons, 1 data point per 4 hours was used (approximately once per  
180 ultradian cycle); for longer term (>3 days of data) statistical comparisons, 1 data point per day was used. Dunn's test  
181 was used for multiple comparisons, and Friedman's tests were utilized in cases of multiple measurements per  
182 individual. Circadian power, visualized in **Figure 2A-D** was smoothed with a 24 h window using the MATLAB function  
183 "movmean". Violin plots, which are similar to box plots with probability density of finding different values represented  
184 by width (Violin Plots 101, 2021), were calculated using the MATLAB function "violin" and used to visualize both  
185 circadian power (**Figure 2J**) and linear CBT (**Figure 4E-G**). Median daily circadian power regressed against each day's  
186 fE2 for each individual using a mixed effects linear regression (MATLAB function "fitlme"). Individuals were treated as  
187 random effects, and fE2/FT and median daily CR power treated as fixed effects (**Figure 2G-H**).

188 *Estradiol and Testosterone Analysis and Statistics.* Fecal estradiol and testosterone concentrations by day of life were  
189 averaged across animals by group and plotted with shaded mean  $\pm$  S.E.M (**Figure 1A,C**). Additionally, in females, data  
190 were plotted using a 4-day window for each cycle of life over which fecal samples were collected. As individual estrous  
191 cycles are not all aligned in time, samples were assessed in 4-day blocks with the highest value in a collection period  
192 (e.g., mid puberty) falling on the third day displayed (**Figure 1B**). That is, during each block, fE2 rose over 3 subsequent  
193 days with a decrease on the fourth. For example, if animal 1 began puberty on p30 and exhibited a 4-day window  
194 peak of fE2 on p33, then that animal's "first cycle" would be displayed and averaged into a group representation of  
195 first cycle as p31, p32, p33, p34. This strategy enabled group assessment of a pre-pubertal 4-day window, as well as  
196 an early, mid, and late pubertal cycle, and an early adulthood cycle for Intact and Intact + C animals.



197 Day of fE2 or fT rise was defined as the first day fE2 or fT concentration rose > 2 standard deviations above its starting  
198 prepubertal value. Relationship to vaginal opening, and preputial separation, are described in **Figure 1D** and **S1**. Group  
199 differences in fE2 area under the curve by cycle were assessed using the MATLAB function “trapz” and Kruskal Wallis  
200 (KW) tests with Dunn’s *post hoc* correction. Hormone differences by day of life were assessed using Friedman’s test.  
201 In order to further assess commencement and stability of estrous cycling after first rise in fE2, metrics were divided  
202 into 4 day blocks, with each day labelled 1,2,3, and 4: repeating for subsequent cycle lengths. Groups for statistical  
203 comparison were constructed from all data corresponding to 1’s, 2’s, 3’s and 4’s. Friedman’s tests with Dunn’s  
204 corrections were used to determine if values associated with each day of cycle (e.g., all day 1’s) varied statistically  
205 from other days of the cycle by group.

## 206 Results

207 *High Frequency Fecal Estradiol and Testosterone Enable Monitoring of Pubertal Progression Under Naturalistic*  
208 *Conditions*. In females, fecal estradiol (fE2) increased after p35 ( $\chi^2= 9.80, p=0.001$ ), and exhibited periodic days  
209 exhibited elevated fE2 thereafter ( $p=0.03$  for days 3 versus day 1 after pubertal onset; **Figure 1A,C-F**). In males, fT  
210 increased after p45 ( $\chi^2= 9.60, p=0.002$ ; **Figure 1B**). The relationship between canonical external signs of pubertal onset  
211 and fE2/ fT rise was dependent on sex: fE2 rose 2 standard deviations prior to vaginal opening in most females (**Figure**  
212 **1D**, top), whereas fT rose 2 standard deviations 1 to 2 weeks after preputial separation in males (**Figure 1D**, bottom).  
213 Weight trajectories for males and females were typical (**S2**).

214 *Sex Differences in Circadian Power are Present from Pre-Adolescence through Adulthood*. CR, but not UR power rose  
215 across early adolescence in both sexes (CR power upward trend  $p=0.009, 0.0012$  for females and males, respectively;  
216 UR power  $p>0.05$  for both sexes; **Figure 2A-C**). Males maintained statistically significantly higher CR power from pre  
217 adolescence to mid adolescence and in early adulthood ( $\chi^2= 8.00, 3.78, 16.53; p=0.005, 0.052, 4.79*10^{-5}$  for pre to  
218 mid adolescence, mid to late adolescence, and late adolescence to early adulthood, respectively; **Figure 2D-F**). CR  
219 power exhibited a non-significant trend toward a 4-day periodic depression after pubertal onset in females ( $p=0.050$ ;  
220 **Figure 2E**). CR power was positively correlated with fE2 in adolescent females ( $p=0.04, r^2=0.08, AIC = -264$ ; **Figure 2G**),  
221 whereas adolescent males exhibited a trend toward a negative correlation between CR power and fE2 ( $p=0.07$ ,

222  $r^2=0.09$ ,  $AIC= -132$ ; **Figure 2H**). This pattern was not present prior to pubertal onset, defined by vaginal opening or  
 223 prepubertal separation, in either sex ( $p=0.54$ ,  $p=0.89$  for females and males, respectively; **Figure 2G-H, insets**).

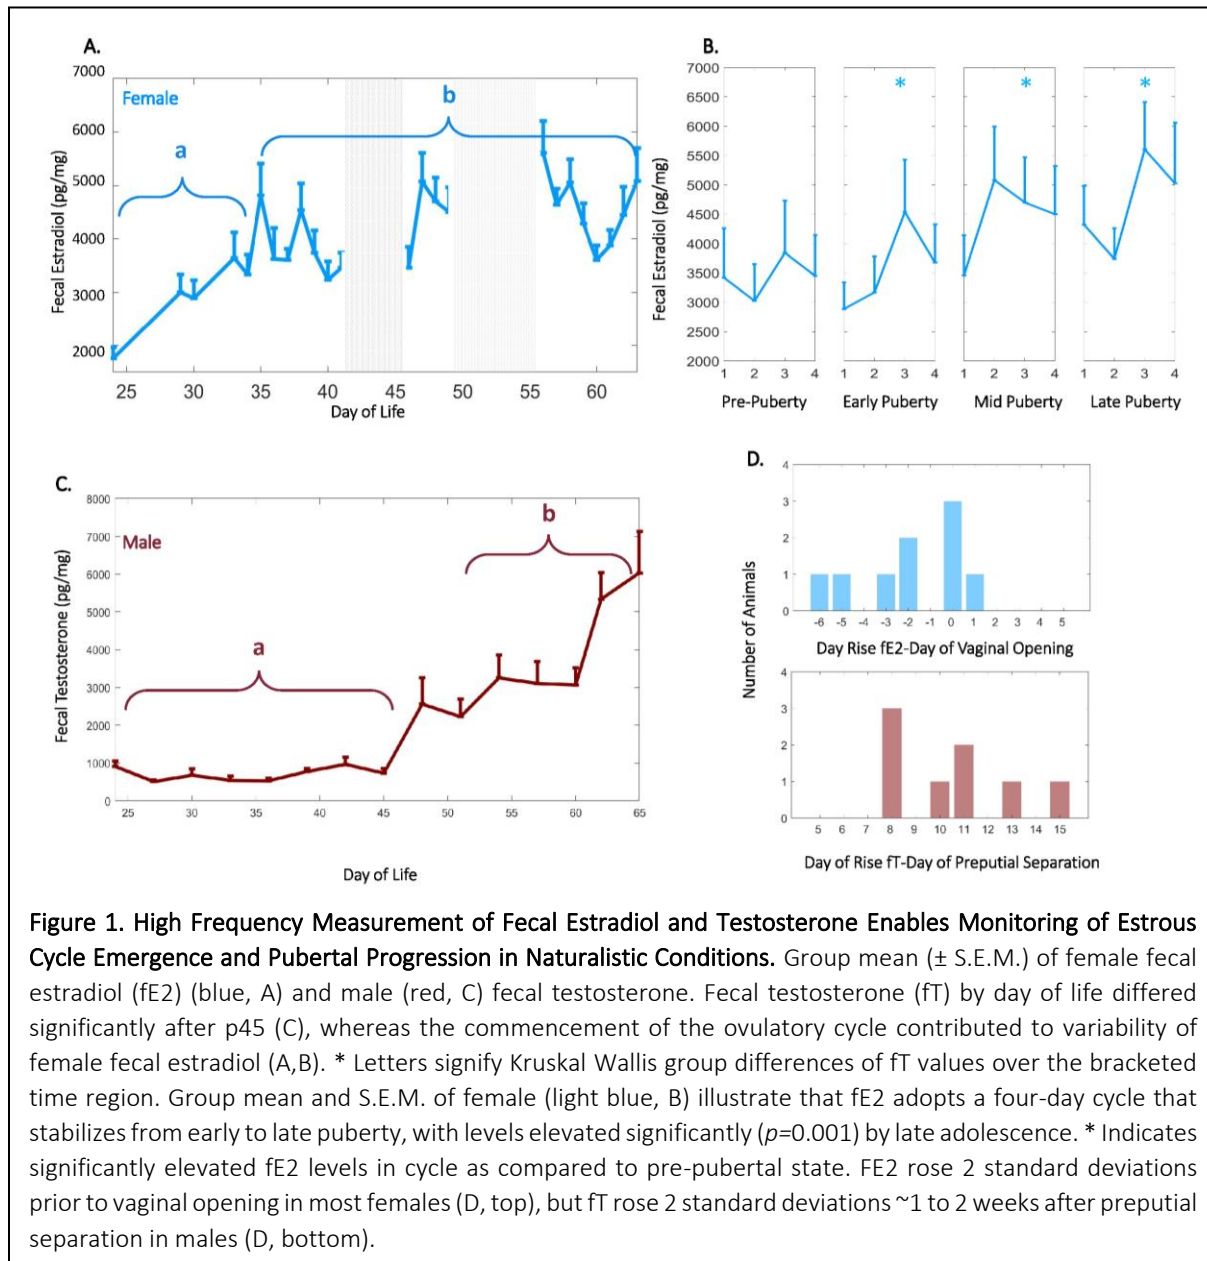

224

225

226

227

228

229

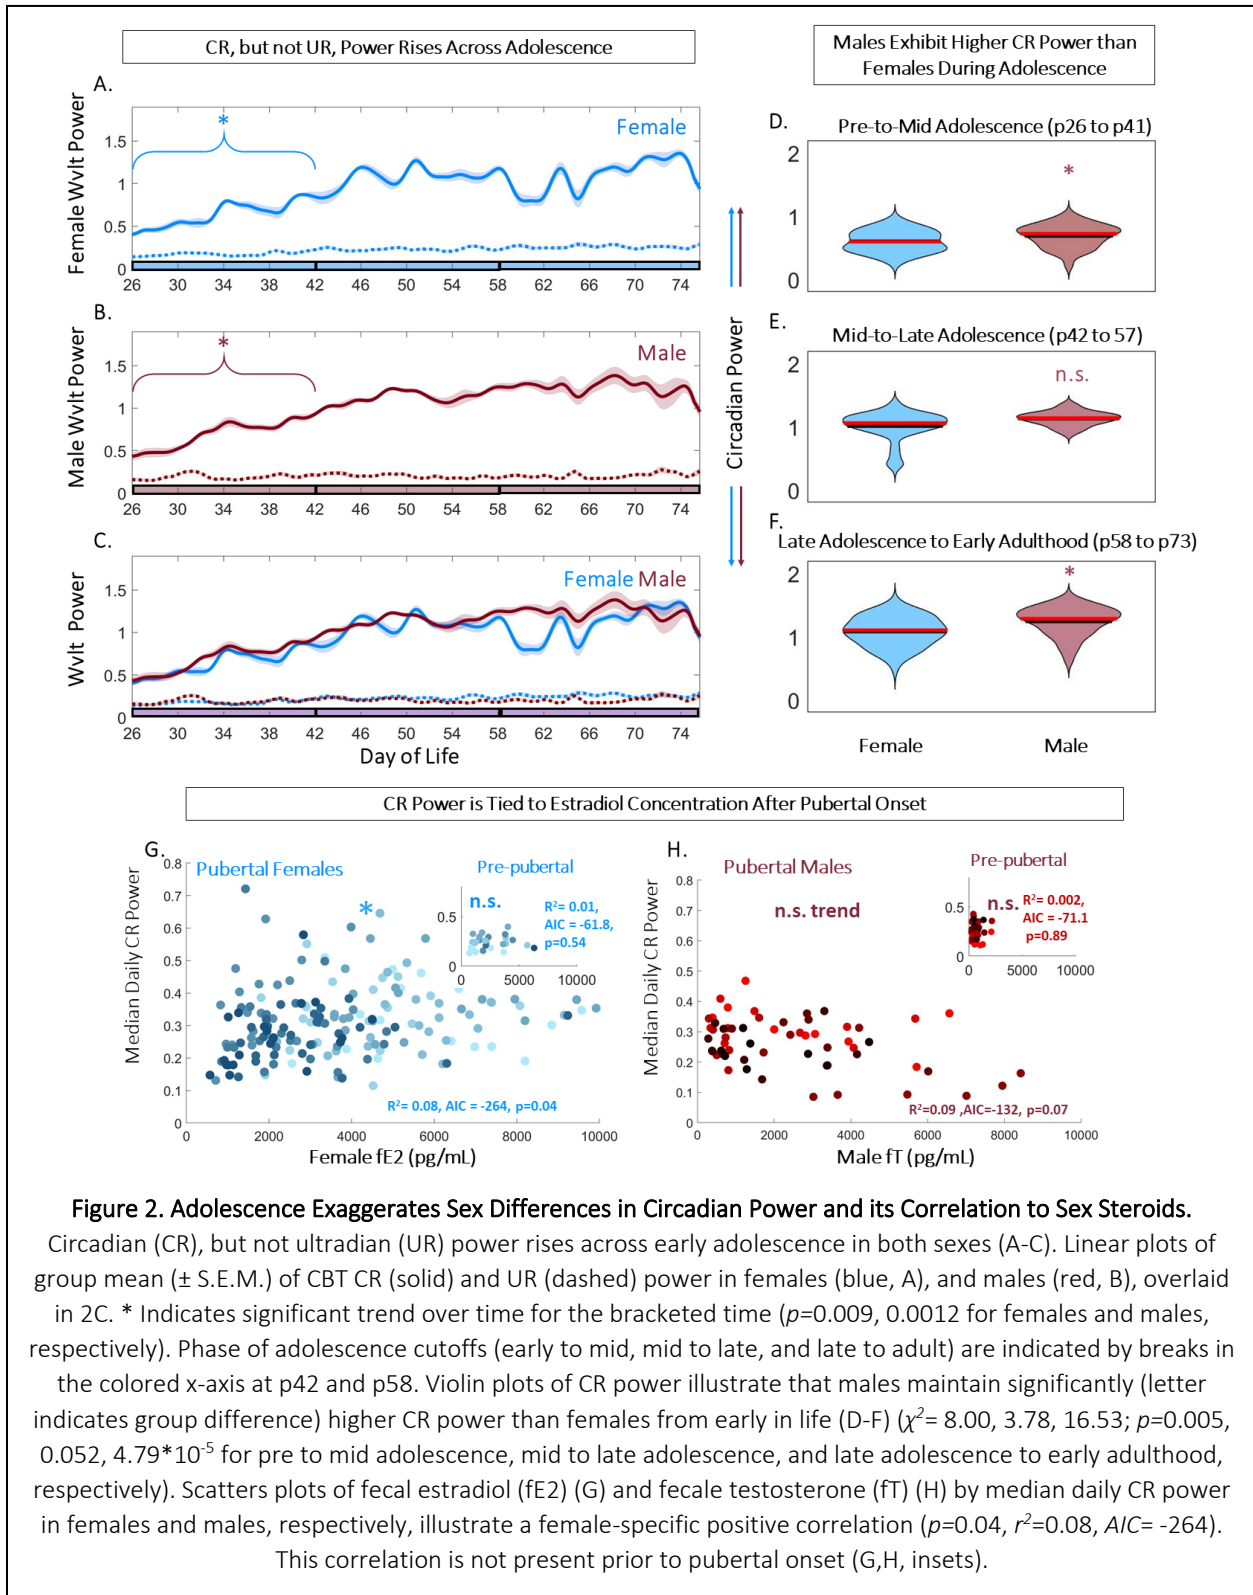

230

12

231

232 *CBT and Ultradian Power Exhibited Sex-Specific Changes.* CBT exhibited an approximately 4-day periodic fluctuation  
233 in females, but not males, commencing with the rise in fE2 and vaginal opening ( $\chi^2=11.5$ , 1.3,  $p=0.003$  and  $p>0.05$  for  
234 females and males, respectively; **Figure 3A-B**). UR power exhibited a comparable 4-day pattern in females ( $\chi^2=8.75$ ,  
235 3.25,  $p=0.005$ ) but not males ( $p>0.05$ ) (**Figure 3A-B**). An FFT of male and female CBT and UR power corroborated these  
236 observations; females exhibited statistically greater A.U.C. for 4 to 5 day periodicity of CBT modulation ( $\chi^2=11.29$ ,  
237  $p=8*10^{-4}$  for sex difference in A.U.C. of 4 to 5 day temperature FFT; **Figure 3C**) and UR modulation ( $\chi^2=9.28$ ,  $p=0.002$   
238 for sex difference in A.U.C. of 4 to 5 day UR Power FFT; UR alignment shown in **Figure 3D**). Additionally, females  
239 exhibited a statistically significant upward trend in temperature from pre to mid adolescence ( $p=1*10^{-5}$  to  $p=0.02$ ;  
240 mean  $p=0.004$ ), and a significant downward trend in body temperature from mid to late adolescence ( $p=0.019$ ) (**Figure**  
241 **4A, 4C**). Conversely, males did not exhibit a statistical trend in temperature from early to mid ( $p=0.07$ ) or from mid  
242 to late adolescence ( $p=0.12$ ) (**Figure 4B-C**). Violin plots of temperatures across adolescence indicated that females  
243 exhibited elevated temperatures compared to males for the entire period of study ( $\chi^2= 25.37$ , 33.84, 25.52;  
244  $p=9.75*10^{-7}$ ,  $5.97*10^{-9}$ ,  $4.37*10^{-7}$  for pre to mid adolescence, mid to late adolescence, and late adolescence to early  
245 adulthood, respectively; **Figure 3A-B, Figure 4D-F**).

246

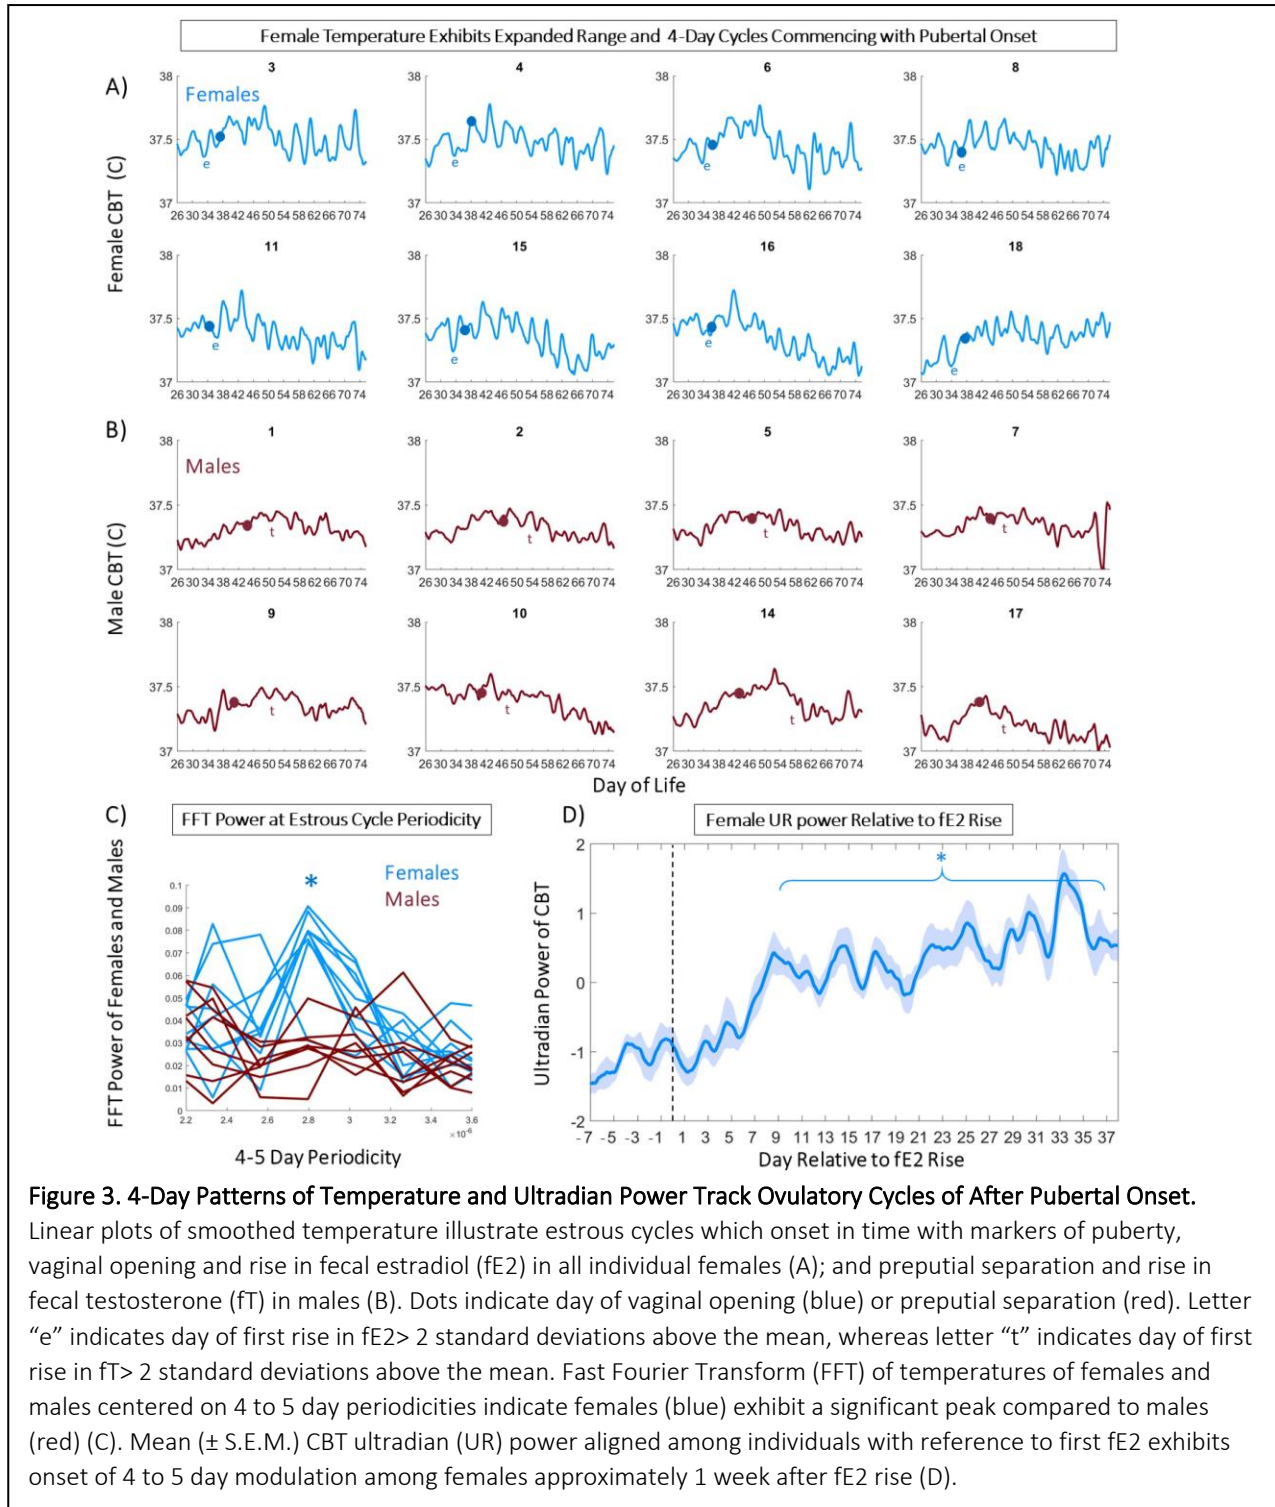

**Figure 3. 4-Day Patterns of Temperature and Ultradian Power Track Ovulatory Cycles of After Pubertal Onset.**

Linear plots of smoothed temperature illustrate estrous cycles which onset in time with markers of puberty, vaginal opening and rise in fecal estradiol (fE2) in all individual females (A); and preputial separation and rise in fecal testosterone (fT) in males (B). Dots indicate day of vaginal opening (blue) or preputial separation (red). Letter “e” indicates day of first rise in fE2 > 2 standard deviations above the mean, whereas letter “t” indicates day of first rise in fT > 2 standard deviations above the mean. Fast Fourier Transform (FFT) of temperatures of females and males centered on 4 to 5 day periodicities indicate females (blue) exhibit a significant peak compared to males (red) (C). Mean ( $\pm$  S.E.M.) CBT ultradian (UR) power aligned among individuals with reference to first fE2 exhibits onset of 4 to 5 day modulation among females approximately 1 week after fE2 rise (D).

247

248

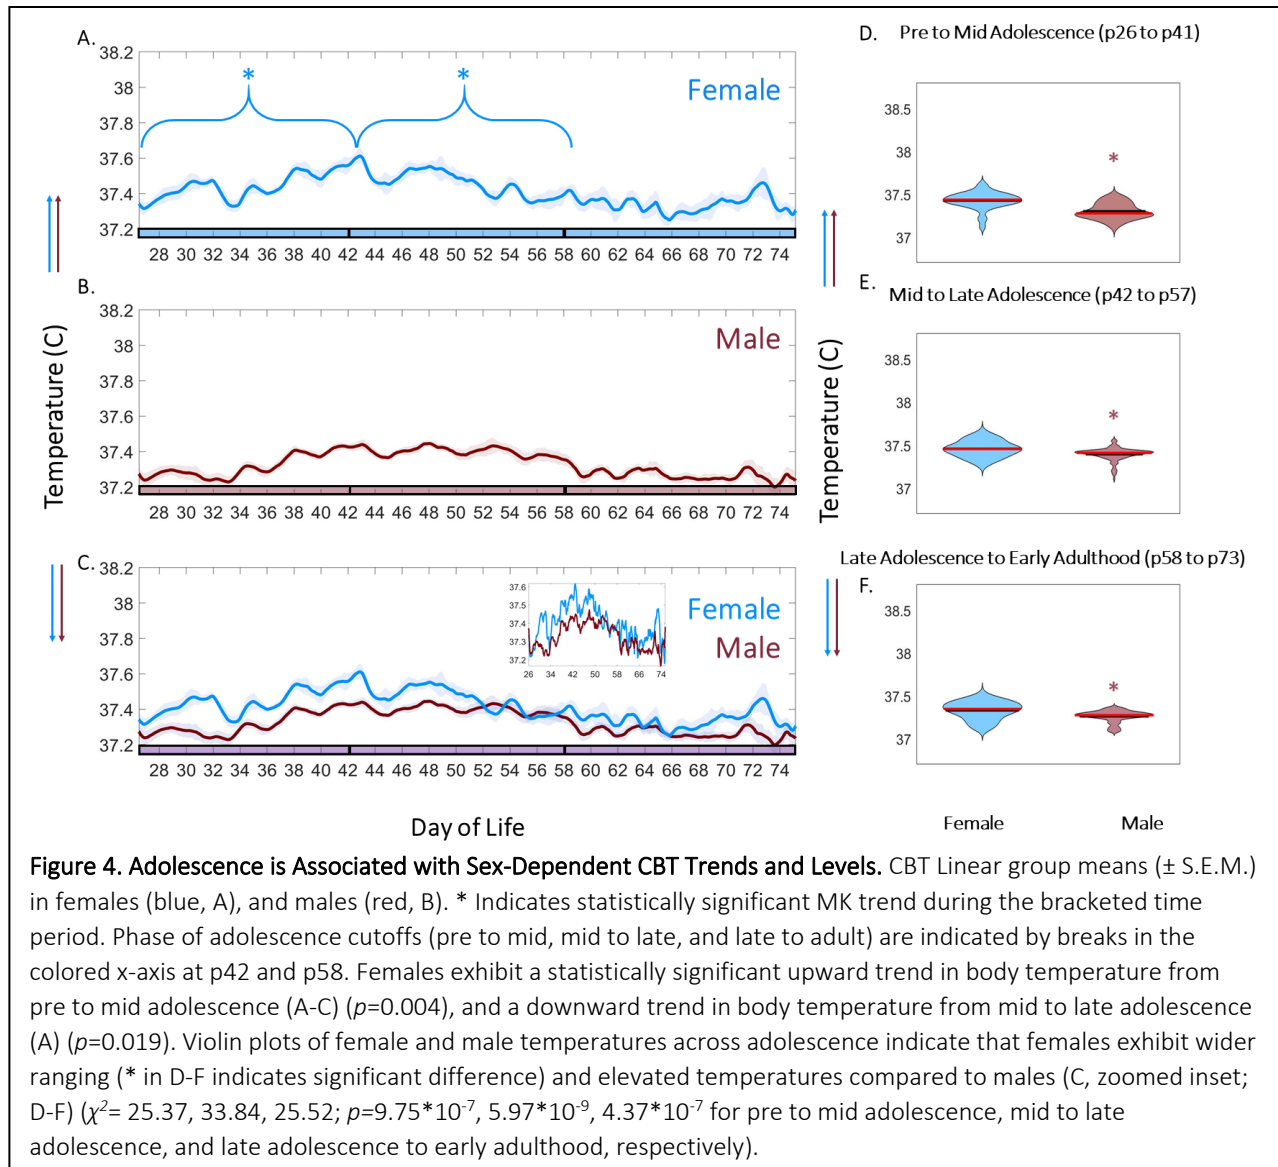

249

250

251

252

253

254

## 255 Discussion and Conclusions

256 The present findings reveal that CBT features gathered in a naturalistic environment can be used to monitor  
257 adolescence, despite the additional variability in sex steroid concentrations and environmental factors compared to  
258 a traditional laboratory environment. Adolescent trends in CBT and CBT rhythmicity observed in the present study  
259 were akin to those of females examined in the laboratory(Grant et al., 2021) with notable sex differences. Males and  
260 females exhibited differential trends in and amplitudes of CR and UR power, with the most notable being the rapid  
261 onset of females' 4-day estrous cycle patterning in CBT URs following the rise in fE2 and vaginal opening. CR power  
262 increased from pre to mid puberty in both sexes, with females exhibiting higher CBT and lower CR power than males.  
263 Despite the observation of higher and more variable fE2 compared to lab-reported values, females retained a  
264 statistically significant correlation between fE2 and CR power after pubertal onset(Grant et al., 2021). In contrast to  
265 the coordinated patterns in fE2 and CBT in females, coordinated changes in CBT structure and fT were not observed  
266 in males. Together, these findings affirm that CBT and CBT rhythmicity remain informative in variable environments,  
267 particularly in females, and support the potential for CBT-based monitoring outside of the laboratory environment  
268 and across species.

269 The similarity among the trajectories of circadian power in males and females is intriguing given that fT rose much  
270 later in males than fE2 in females(Hagenauer et al., 2011; MacKinnon et al., 1978; Sengupta, 2013). Because the rise  
271 in fT was temporally decoupled from rhythmic metrics and preputial separation, a sex-steroid-independent  
272 physiological change might drive an early rise CBT rhythmicity (e.g., melatonin(Cavallo, 1993; Rivest et al., 1986) or  
273 growth hormone(Dunger et al., 1991; Grant et al., 2018)). Despite remarkable similarities in adolescent circadian,  
274 ultradian, and CBT trajectories between the sexes, the presence of elevated CBT (which persists into  
275 adulthood(Zuloaga et al., 2009)) and reduced circadian power in females, suggests that continuous-temperature-  
276 based diagnostic algorithms should take sex into account during training and validation.

277 If the features described here have analogous counterparts in human populations, as has recently been shown for  
278 continuous temperature for female LH surge anticipation(Grant et al., 2020; Webster and Smarr, 2020),  
279 pregnancy(Grant et al., 2021), and fever(Smarr et al., 2020); then this approach can be applied to develop powerful



280 tools to further understand key developmental events. At present, children in developed nations begin puberty at an  
281 earlier age than in past decades, attributed to body fat and stress-related factors(Bellis et al., 2006, p. 12; Chittwar et  
282 al., 2012; Delemarre-van de Waal et al., 2002; Herbison, 2016; Parent et al., 2003). Additionally, these children are  
283 subject to widely varying temporal disruptions in the form of light at night(Casper and Gladanac, 2014; Jain Gupta and  
284 Khare, 2020; Smarr and Schirmer, 2018), late meals(Jain Gupta and Khare, 2020), and female hormonal  
285 contraceptives(Apter, 2018). Despite the need for monitoring the effects and interactions of these variables on  
286 pubertal health, clinicians are equipped with relatively low temporal resolution tools for pubertal staging and  
287 diagnosis(Elchuri and Momen, 2020; Klein et al., 2017; Lauffer et al., 2020). Furthermore, the importance of rhythmic  
288 stability throughout adolescent development is often not considered by families or pediatricians(Owens and Weiss,  
289 2017).

290 Peripheral measurements of temperature, such as those from the iButton(Hasselberg et al., 2013) or Oura Ring(Grant  
291 et al., 2020; Majjala et al., 2019), could be sufficient for peripubertal detection of temperature and ultradian power  
292 rises(Grant et al., 2020), and could be used to develop a population-wide database characterizing features associated  
293 with pubertal onset and development. Indeed, rhythmic features of body temperature have already formed the basis  
294 of methods for monitoring reproductive health, including pubertal onset(Grant et al., 2021) and contraceptive use in  
295 a laboratory setting(Grant et al., 2021), adult fertility in controlled and real world conditions(Grant et al., 2020;  
296 Prendergast et al., 2012; Sanchez-Alavez et al., 2011; Smarr et al., 2017), and pregnancy in the laboratory and in small,  
297 retrospective cohorts(Grant et al., 2021.; Smarr et al., 2016; Wang et al., 2014). Such tools could be informative and  
298 empowering to young people during puberty, potentially anticipating first onset of menses(Fowler et al., 2020;  
299 Wartella et al., 2016), impending growth spurts, or for identifying adverse reactions to disruptive behavior(Asimes et  
300 al., 2018; Logan et al., 2018) and medication(Apter, 2018). If adopted and studied in teen populations, these metrics  
301 could be used to generate the first high-temporal-resolution images of healthy adolescent development and to aid  
302 early diagnosis via detection of deviations from a personalized healthy trajectory.

303 Together, non-invasive sex steroid measurement and chronic observation of CBT rhythms and amplitude represent  
304 promising metrics for the detection of pubertal onset and monitoring of the developmental trajectory in both sexes  
305 under naturalistic conditions, particularly in females. Future work is needed to determine the extent to which such

306 features are extant and coordinated with markers of puberty in humans, but the present findings in rats suggest the  
307 feasibility of such an approach.

308

309 Supplemental Figures

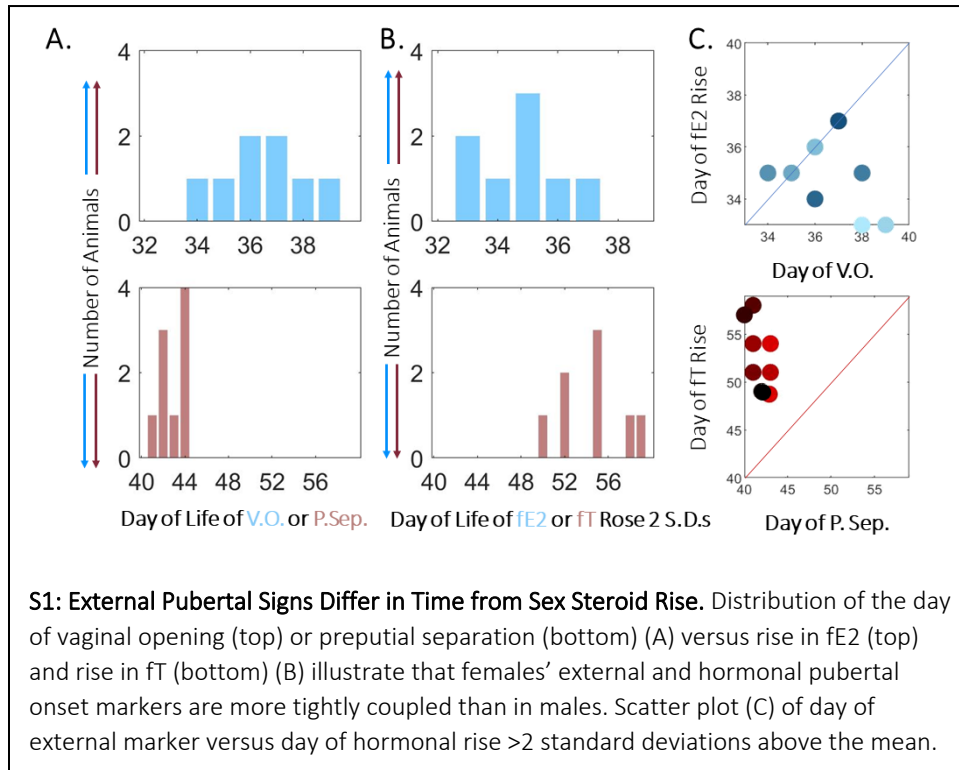

317

318

319

320

321

322

323

324

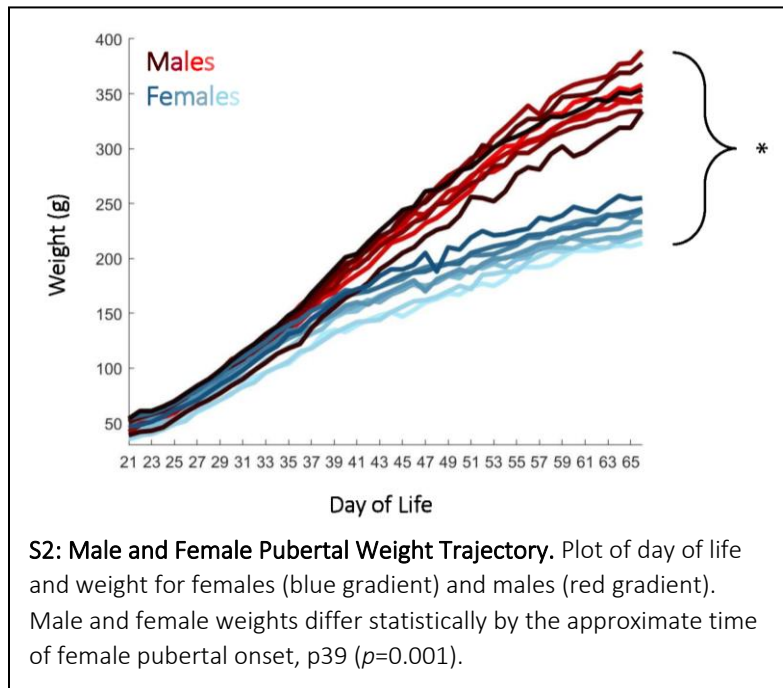

333

334

335

336

337

338

339

340

341

342

343

344 References

- 345 Akin A, Elstein M (1975) The value of the basal temperature chart in the management of infertility. *Int J*  
346 *Fertil* 20:122–124.
- 347 Albertsson-Wikland K, Rosberg S, Lannering B, Dunkel L, Selstam G, Norjavaara E (1997) Twenty-Four-  
348 Hour Profiles of Luteinizing Hormone, Follicle-Stimulating Hormone, Testosterone, and Estradiol  
349 Levels: A Semilogitudinal Study throughout Puberty in Healthy Boys. *J Clin Endocrinol Metab*  
350 82:541–549.
- 351 Ankarberg C, Norjavaara E (1999) Diurnal rhythm of testosterone secretion before and throughout  
352 puberty in healthy girls: correlation with 17beta-estradiol and dehydroepiandrosterone sulfate. *J*  
353 *Clin Endocrinol Metab* 84:975–984.
- 354 Apter D (2018) Contraception options: Aspects unique to adolescent and young adult. *Best Pract Res Clin*  
355 *Obstet Gynaecol* 48:115–127.
- 356 Asimes A, Kim CK, Cuarenta A, Auger AP, Pak TR (2018) Binge Drinking and Intergenerational  
357 Implications: Parental Preconception Alcohol Impacts Offspring Development in Rats. *J Endocr*  
358 *Soc* 2:672–686.
- 359 Auer KE, Kußmaul M, Möstl E, Hohlbaum K, Rülcke T, Palme R (2020) Measurement of Fecal  
360 Testosterone Metabolites in Mice: Replacement of Invasive Techniques. *Anim Open Access J*  
361 *MDPI* 10.
- 362 azuredominique (2021) azuredominique/Rat-Puberty-Lab-Conditions.
- 363 Bakshi VP, Geyer MA (1999) Ontogeny of isolation rearing-induced deficits in sensorimotor gating in  
364 rats. *Physiol Behav* 67:385–392.
- 365 Bellis MA, Downing J, Ashton JR (2006) Adults at 12? Trends in puberty and their public health  
366 consequences. *J Epidemiol Community Health* 60:910–911.
- 367 Bhavani SV, Carey KA, Gilbert ER, Afshar M, Verhoef PA, Churpek MM (2019) Identifying Novel Sepsis  
368 Subphenotypes Using Temperature Trajectories. *Am J Respir Crit Care Med* 200:327–335.
- 369 Boggiano MM, Cavigelli SA, Dorsey JR, Kelley CEP, Ragan CM, Chandler-Laney PC (2008) Effect of a cage  
370 divider permitting social stimuli on stress and food intake in rats. *Physiol Behav* 95:222–228.
- 371 Bourguignon JP (1988) Time-related neuroendocrine manifestations of puberty: a combined clinical and  
372 experimental approach extracted from the 4th Belgian Endocrine Society lecture. *Horm Res*  
373 30:224–234.
- 374 Brown-Douglas CG, Firth EC, Parkinson TJ, Fennessy PF (2004) Onset of puberty in pasture-raised  
375 Thoroughbreds born in southern hemisphere spring and autumn. *Equine Vet J* 36:499–504.
- 376 Buxton CL, Atkinson WB (1948) Hormonal factors involved in the regulation of basal body temperature  
377 during the menstrual cycle and pregnancy. *J Clin Endocrinol Metab* 8:544–549.
- 378 Campbell-Page RM, Shaw-Ridley M (2013) Managing Ethical Dilemmas in Community-Based  
379 Participatory Research With Vulnerable Populations. *Health Promot Pract* 14:485–490.
- 380 Casper RF, Gladanac B (2014) Introduction: circadian rhythm and its disruption: impact on reproductive  
381 function. *Fertil Steril* 102:319–320.
- 382 Cavallo A (1993) Melatonin and human puberty: current perspectives. *J Pineal Res* 15:115–121.
- 383 Chittwar S, Shivprakash, Ammini AC (2012) Precocious puberty in girls. *Indian J Endocrinol Metab*  
384 16:S188–S191.
- 385 Daan S, Slopsema S (1978) Short-term rhythms in foraging behaviour of the common vole, *Microtus*  
386 *arvalis*. *J Comp Physiol* 127:215–227.
- 387 de Kloet ER, Sarabdjitsingh RA (2008) Everything has rhythm: focus on glucocorticoid pulsatility.  
388 *Endocrinology* 149:3241–3243.

- 389 Delemarre-van de Waal HA, van Coeverden SCCM, Engelbregt MTJ (2002) Factors affecting onset of  
390 puberty. *Horm Res* 57 Suppl 2:15–18.
- 391 Dunger DB, Matthews DR, Edge JA, Jones J, Preece MA (1991) Evidence for temporal coupling of growth  
392 hormone, prolactin, LH and FSH pulsatility overnight during normal puberty. *J Endocrinol*  
393 130:141–149.
- 394 Elchuri SV, Momen JJ (2020) Disorders of Pubertal Onset. *Prim Care Clin Off Pract, Adolescent Medicine*  
395 47:189–216.
- 396 Fowler LR, Gillard C, Morain S (2020) Teenage Use of Smartphone Applications for Menstrual Cycle  
397 Tracking. *Pediatrics* 145.
- 398 Franklin AD, Waddell WT, Behrns S, Goodrowe KL (2020) Estrous cyclicity and reproductive success are  
399 unaffected by translocation for the formation of new reproductive pairs in captive red wolves  
400 (*Canis rufus*). *Zoo Biol* 39:230–238.
- 401 Garcia J, Rosen G, Mahowald M (2001) Circadian rhythms and circadian rhythm disorders in children and  
402 adolescents. *Semin Pediatr Neurol* 8:229–240.
- 403 Gear AJCH (2014) Wearables Are Totally Failing the People Who Need Them Most [WWW Document].  
404 WIRED. URL <https://www.wired.com/2014/11/where-fitness-trackers-fail/> (accessed 8.4.17).
- 405 Goh GH, Maloney SK, Mark PJ, Blache D (2019) Episodic Ultradian Events—Ultradian Rhythms. *Biology*  
406 8:15.
- 407 Grant AD, Smarr B (2021). Feasibility of Continuous Distal Body Temperature for Passive, Early  
408 Pregnancy Detection *BioArxiv*, 24.
- 409 Grant AD, Newman M, Kriegsfeld LJ (2020) Ultradian rhythms in heart rate variability and distal body  
410 temperature anticipate onset of the luteinizing hormone surge. *Sci Rep* 10:20378.
- 411 Grant AD, Wilbrecht L, Kriegsfeld LJ (2021) Adolescent Development of Biological Rhythms: Estradiol  
412 Dependence and Effects of Combined Contraceptives. *bioRxiv* 2021.07.20.453145.
- 413 Grant AD, Wilsterman K, Smarr BL, Kriegsfeld LJ (2018) Evidence for a Coupled Oscillator Model of  
414 Endocrine Ultradian Rhythms. *J Biol Rhythms* 33:475–496.
- 415 Grant AD, Wolf GI, Nebeker C (2019) Approaches to governance of participant-led research: a qualitative  
416 case study. *BMJ Open* 9:e025633.
- 417 Hagenauer MH, King AF, Possidente B, McGinnis MY, Lumia AR, Peckham EM, Lee TM (2011) Changes in  
418 circadian rhythms during puberty in *Rattus norvegicus*: developmental time course and gonadal  
419 dependency. *Horm Behav* 60:46–57.
- 420 Harper JM, Austad SN (2000) Fecal glucocorticoids: a noninvasive method of measuring adrenal activity  
421 in wild and captive rodents. *Physiol Biochem Zool* 73:12–22.
- 422 Hasselberg MJ, McMahon J, Parker K (2013) The validity, reliability, and utility of the iButton® for  
423 measurement of body temperature circadian rhythms in sleep/wake research. *Sleep Med* 14:5–  
424 11.
- 425 Herbison AE (2016) Control of puberty onset and fertility by gonadotropin-releasing hormone neurons.  
426 *Nat Rev Endocrinol* 12:452–466.
- 427 Hoogenboom I, Daan S, Dallinga JH, Schoenmakers M (1984) Seasonal Change in the Daily Timing of  
428 Behaviour of the Common Vole, *Microtus arvalis*. *Oecologia* 61:18–31.
- 429 Jain Gupta N, Khare A (2020) Disruption in daily eating-fasting and activity-rest cycles in Indian  
430 adolescents attending school. *PloS One* 15:e0227002.
- 431 Joyce DS, Zele AJ, Feigl B, Adhikari P (2020) The accuracy of artificial and natural light measurements by  
432 actigraphs. *J Sleep Res* 29:e12963.
- 433 Kalliokoski O, Teilmann AC, Abelson KSP, Hau J (2015) The distorting effect of varying diets on fecal  
434 glucocorticoid measurements as indicators of stress: A cautionary demonstration using  
435 laboratory mice. *Gen Comp Endocrinol* 211:147–153.

- 436 Kim HJ, Harrington ME (2008) Neuropeptide Y-deficient mice show altered circadian response to  
437 simulated natural photoperiod. *Brain Res* 1246:96–100.
- 438 Klein DA, Emerick JE, Sylvester JE, Vogt KS (2017) Disorders of Puberty: An Approach to Diagnosis and  
439 Management. *Am Fam Physician* 96:590–599.
- 440 Kottler ML, Coussieu C, Valensi P, Levi F, Degrelle H (1989) Ultradian, circadian and seasonal variations  
441 of plasma progesterone and LH concentrations during the luteal phase. *Chronobiol Int* 6:267–  
442 277.
- 443 Kriegsfeld-Lab - Overview [WWW Document] (n.d.) . GitHub. URL <https://github.com/Kriegsfeld-Lab>  
444 (accessed 5.24.21).
- 445 Lafaille M, Gouat P, Féron C (2015) Efficiency of delayed reproduction in *Mus spicilegus*. *Reprod Fertil*  
446 *Dev* 27:491–496.
- 447 Lauffer P, Mooij CF, Zwaveling-Soonawala N, Trotsenburg ASP van (2020) Reforming the male Tanner  
448 genital scale. *J Pediatr Endocrinol Metab* 33:425–426.
- 449 Leise TL (2015) Chapter Five - Wavelet-Based Analysis of Circadian Behavioral Rhythms In: *Methods in*  
450 *Enzymology, Circadian Rhythms and Biological Clocks, Part A* (Sehgal A ed), pp95–119. Academic  
451 Press.
- 452 Leise TL (2013) Wavelet analysis of circadian and ultradian behavioral rhythms. *J Circadian Rhythms*  
453 11:5.
- 454 Lewis R, Curtis JT (2016) Male prairie voles display cardiovascular dipping associated with an ultradian  
455 activity cycle. *Physiol Behav* 156:106–116.
- 456 Lilly JM, Olhede SC (2012) Generalized Morse Wavelets as a Superfamily of Analytic Wavelets. *IEEE Trans*  
457 *Signal Process* 60:6036–6041.
- 458 Logan RW, Hasler BP, Forbes EE, Franzen PL, Torregrossa MM, Huang YH, Buysse DJ, Clark DB, McClung  
459 CA (2018) Impact of Sleep and Circadian Rhythms on Addiction Vulnerability in Adolescents. *Biol*  
460 *Psychiatry* 83:987–996.
- 461 Lv X et al. (2020) Reprogramming of ovarian granulosa cells by YAP1 leads to development of high-grade  
462 cancer with mesenchymal lineage and serous features. *Sci Bull* 65:1281–1296.
- 463 MacKinnon PCB, Puig-Duran E, Laynes R (1978) Reflections on the attainment of puberty in the rat: have  
464 circadian signals a role to play in its onset? *Reproduction* 52:401–412.
- 465 Majjala A, Kinnunen H, Koskimäki H, Jämsä T, Kangas M (2019) Nocturnal finger skin temperature in  
466 menstrual cycle tracking: ambulatory pilot study using a wearable Oura ring. *BMC Womens*  
467 *Health* 19:150.
- 468 Mathew L, Gaikwad A, Gonzalez A, Nugent EK, Smith JA (2017) Evaluation of Active Hexose Correlated  
469 Compound (AHCC) in Combination With Anticancer Hormones in Orthotopic Breast Cancer  
470 Models. *Integr Cancer Ther* 16:300–307.
- 471 Meijer JH, Michel S, Vanderleest HT, Rohling JHT (2010) Daily and seasonal adaptation of the circadian  
472 clock requires plasticity of the SCN neuronal network. *Eur J Neurosci* 32:2143–2151.
- 473 Millspaugh JJ, Washburn BE (2003) Within-sample variation of fecal glucocorticoid measurements. *Gen*  
474 *Comp Endocrinol* 132:21–26.
- 475 Mohawk JA, Green CB, Takahashi JS (2012) Central and peripheral circadian clocks in mammals. *Annu*  
476 *Rev Neurosci* 35:445–462.
- 477 Neurodevelopmental Consequences of Maternal Omega-3 Fatty Acid Deficiency - ProQuest [WWW  
478 Document] (n.d.). URL  
479 [https://search.proquest.com/openview/2b9eaffc7b3f492b60daf6e1fababebd/1?pq-](https://search.proquest.com/openview/2b9eaffc7b3f492b60daf6e1fababebd/1?pq-origsite=gscholar&cbl=2026366&diss=y)  
480 [origsite=gscholar&cbl=2026366&diss=y](https://search.proquest.com/openview/2b9eaffc7b3f492b60daf6e1fababebd/1?pq-origsite=gscholar&cbl=2026366&diss=y) (accessed 3.3.21).
- 481 Norjavaara E, Ankarberg C, Albertsson-Wikland K (1996) Diurnal rhythm of 17 beta-estradiol secretion  
482 throughout pubertal development in healthy girls: evaluation by a sensitive radioimmunoassay.  
483 *J Clin Endocrinol Metab* 81:4095–4102.



- 484 Owens JA, Weiss MR (2017) Insufficient sleep in adolescents: causes and consequences. *Minerva Pediatr*  
485 69:326–336.
- 486 Parent A-S, Teilmann G, Juul A, Skakkebaek NE, Toppari J, Bourguignon J-P (2003) The Timing of Normal  
487 Puberty and the Age Limits of Sexual Precocity: Variations around the World, Secular Trends,  
488 and Changes after Migration. *Endocr Rev* 24:668–693.
- 489 Park JH, Spencer EM, Place NJ, Jordan CL, Zucker I (2003) Seasonal control of penile development of  
490 Siberian hamsters (*Phodopus sungorus*) by daylength and testicular hormones. *Reprod Camb*  
491 *Engl* 125:397–407.
- 492 Steroid Solid Extraction [WWW Document]. *Arbor Assays*. URL  
493 <https://www.arborassays.com/resource/steroid-solid-extraction/> (accessed 3.3.21).
- 494 Prendergast BJ, Beery AK, Paul MJ, Zucker I (2012) Enhancement and Suppression of Ultradian and  
495 Circadian Rhythms across the Female Hamster Reproductive Cycle. *J Biol Rhythms* 27:246–256.
- 496 Righetti F, Tybur J, Van Lange P, Echelmeyer L, van Esveld S, Kroese J, van Brecht J, Gangestad S (2020)  
497 How reproductive hormonal changes affect relationship dynamics for women and men: A 15-  
498 day diary study. *Biol Psychol* 149:107784.
- 499 Rivest RW, Aubert ML, Lang U, Sizonenko PC (1986) Puberty in the rat: modulation by melatonin and  
500 light. *J Neural Transm Suppl* 21:81–108.
- 501 Rueda-Quijano SM, Amador-Ariza MA, Arboleda AM, Otero J, Cohen D, Camacho PA, Jaramillo PL (2019)  
502 [Concordance of the assessment of pubertal development with the Tanner scale between  
503 adolescents and a trained physician]. *Rev Peru Med Exp Salud Publica* 36:408–413.
- 504 Sanchez-Alavez M et al. (2010) Insulin causes hyperthermia by direct inhibition of warm-sensitive  
505 neurons. *Diabetes* 59:43–50.
- 506 Sanchez-Alavez M, Alboni S, Conti B (2011) Sex- and age-specific differences in core body temperature of  
507 C57Bl/6 mice. *Age Dordr Neth* 33:89–99.
- 508 Sengupta P (2013) The Laboratory Rat: Relating Its Age With Human's. *Int J Prev Med* 4:624–630.
- 509 Shirtcliff EA, Dahl RE, Pollak SD (2009) Pubertal development: correspondence between hormonal and  
510 physical development. *Child Dev* 80:327–337.
- 511 Silva C-C, Domínguez R (2020) Clock control of mammalian reproductive cycles: Looking beyond the pre-  
512 ovulatory surge of gonadotropins. *Rev Endocr Metab Disord* 21:149–163.
- 513 Smarr BL, Aschbacher K, Fisher SM, Chowdhary A, Dilchert S, Puldon K, Rao A, Hecht FM, Mason AE  
514 (2020) Feasibility of continuous fever monitoring using wearable devices. *Sci Rep* 10.
- 515 Smarr BL, Grant AD, Zucker I, Prendergast BJ, Kriegsfeld LJ (2017) Sex differences in variability across  
516 timescales in BALB/c mice. *Biol Sex Differ* 8:7.
- 517 Smarr BL, Schirmer AE (2018) 3.4 million real-world learning management system logins reveal the  
518 majority of students experience social jet lag correlated with decreased performance. *Sci Rep*  
519 8:4793.
- 520 Smarr BL, Zucker I, Kriegsfeld LJ (2016) Detection of Successful and Unsuccessful Pregnancies in Mice  
521 within Hours of Pairing through Frequency Analysis of High Temporal Resolution Core Body  
522 Temperature Data. *PloS One* 11:e0160127.
- 523 Steadman C (2019) The effect of spinal cord injury on sexual function. University of Louisville.
- 524 Steadman CJ, Hoey RF, Montgomery LR, Hubscher CH (2019) Activity-Based Training Alters Penile Reflex  
525 Responses in a Rat Model of Spinal Cord Injury. *J Sex Med* 16:1143–1154.
- 526 Steiger SS, Valcu M, Spoelstra K, Helm B, Wikelski M, Kempenaers B (2013) When the sun never sets:  
527 diverse activity rhythms under continuous daylight in free-living arctic-breeding birds. *Proc Biol*  
528 *Sci* 280:20131016.
- 529 Stothard ER, McHill AW, Depner CM, Birks BR, Moehlman TM, Ritchie HK, Guzzetti JR, Chinoy ED,  
530 LeBourgeois MK, Axelsson J, Wright Jr. KP (2017) Circadian Entrainment to the Natural Light-  
531 Dark Cycle across Seasons and the Weekend. *Curr Biol* 27:508–513.

- 532 The Mammalian Circadian Timing System: Organization and Coordination of Central and Peripheral  
533 Clocks (2010). *Annu Rev Physiol* 72:517–549.
- 534 Touma C, Palme R, Sachser N (2004) Analyzing corticosterone metabolites in fecal samples of mice: a  
535 noninvasive technique to monitor stress hormones. *Horm Behav* 45:10–22.
- 536 Vidal JD (2017) The Impact of Age on the Female Reproductive System. *Toxicol Pathol* 45:206–215.
- 537 Violin Plots 101: Visualizing Distribution and Probability Density [WWW Document] (n.d.). URL  
538 <https://mode.com/blog/violin-plot-examples/> (accessed 3.3.21).
- 539 Wang ZY, Cable EJ, Zucker I, Prendergast BJ (2014) Pregnancy-induced changes in ultradian rhythms  
540 persist in circadian arrhythmic Siberian hamsters. *Horm Behav* 66:228–237.
- 541 Wartella E, Rideout V, Montague H, Beaudoin-Ryan L, Lauricella A (2016) Teens, health and technology:  
542 A national survey. *Media Commun* 4:13–23.
- 543 Webster WW, Smarr B (2020) Using Circadian Rhythm Patterns of Continuous Core Body Temperature  
544 to Improve Fertility and Pregnancy Planning. *J Circadian Rhythms* 18:5.
- 545 Williams H, Dacks PA, Rance NE (2010) An Improved Method for Recording Tail Skin Temperature in the  
546 Rat Reveals Changes During the Estrous Cycle and Effects of Ovarian Steroids. *Endocrinology*  
547 151:5389–5394.
- 548 Woodruff JA, Lacey EA, Bentley G (2010) Contrasting fecal corticosterone metabolite levels in captive  
549 and free-living colonial tuco-tucos (*Ctenomys sociabilis*). *J Exp Zool Part Ecol Genet Physiol*  
550 313A:498–507.
- 551 Woodruff JA, Lacey EA, Bentley GE, Kriegsfeld LJ (2013) Effects of social environment on baseline  
552 glucocorticoid levels in a communally breeding rodent, the colonial tuco-tuco (*Ctenomys*  
553 *sociabilis*). *Horm Behav* 64:566–572.
- 554 Zuloaga DG, McGivern RF, Handa RJ (2009) Organizational influence of the postnatal testosterone surge  
555 on the circadian rhythm of core body temperature of adult male rats. *Brain Res* 1268:68–75.

556

557

558

559

560

561

562

563

564

565



566 **Figure Legends.**

567 **Figure 1. High Frequency Measurement of Fecal Estradiol and Testosterone Enables Monitoring of Estrous Cycle**

568 **Emergence and Pubertal Progression in Naturalistic Conditions.** Group mean ( $\pm$  S.E.M.) of female fecal estradiol (fE2)  
569 (blue, A) and male (red, C) fecal testosterone. Fecal testosterone (fT) by day of life differed significantly after p45  
570 (C), whereas the commencement of the ovulatory cycle contributed to variability of female fecal estradiol (A,B). \*  
571 Letters signify Kruskal Wallis group differences of fT values over the bracketed time region. Group mean and S.E.M.  
572 of female (light blue, B) illustrate that fE2 adopts a four-day cycle that stabilizes from early to late puberty, with  
573 levels elevated significantly ( $p=0.001$ ) by late adolescence. \* Indicates significantly elevated fE2 levels in cycle as  
574 compared to pre-pubertal state. FE2 rose 2 standard deviations prior to vaginal opening in most females (D, top),  
575 but fT rose 2 standard deviations  $\sim$ 1 to 2 weeks after preputial separation in males (D, bottom).

576 **Figure 2. Adolescence Exaggerates Sex Differences in Circadian Power and its Correlation to Sex Steroids.** Circadian

577 (CR), but not ultradian (UR) power rises across early adolescence in both sexes (A-C). Linear plots of group mean ( $\pm$   
578 S.E.M.) of CBT CR (solid) and UR (dashed) power in females (blue, A), and males (red, B), overlaid in 2C. \* Indicates  
579 significant trend over time for the bracketed time ( $p=0.009$ ,  $0.0012$  for females and males, respectively). Phase of  
580 adolescence cutoffs (early to mid, mid to late, and late to adult) are indicated by breaks in the colored x-axis at p42  
581 and p58. Violin plots of CR power illustrate that males maintain significantly (letter indicates group difference)  
582 higher CR power than females from early in life (D-F) ( $\chi^2= 8.00, 3.78, 16.53$ ;  $p=0.005, 0.052, 4.79 \times 10^{-5}$  for pre to mid  
583 adolescence, mid to late adolescence, and late adolescence to early adulthood, respectively). Scatters plots of fecal  
584 estradiol (fE2) (G) and fecale testosterone (fT) (H) by median daily CR power in females and males, respectively,  
585 illustrate a female-specific positive correlation ( $p=0.04$ ,  $r^2=0.08$ ,  $AIC= -264$ ). This correlation is not present prior to  
586 pubertal onset (G,H, insets).

587 **Figure 3. 4-Day Patterns of Temperature and Ultradian Power Track Ovulatory Cycles of After Pubertal Onset.** Linear

588 plots of smoothed temperature illustrate estrous cycles which onset in time with markers of puberty, vaginal  
589 opening and rise in fecal estradiol (fE2) in all individual females (A); and preputial separation and rise in fecal  
590 testosterone (fT) in males (B). Dots indicate day of vaginal opening (blue) or preputial separation (red). Letter “e”  
591 indicates day of first rise in fE2 > 2 standard deviations above the mean, whereas letter “t” indicates day of first rise

592 in  $fT > 2$  standard deviations above the mean. Fast Fourier Transform (FFT) of temperatures of females and males  
593 centered on 4 to 5 day periodicities indicate females (blue) exhibit a significant peak compared to males (red) (C).  
594 Mean ( $\pm$  S.E.M.) CBT ultradian (UR) power aligned among individuals with reference to first fE2 exhibits onset of 4 to  
595 5 day modulation among females approximately 1 week after fE2 rise (D).

596 **Figure 4. Adolescence is Associated with Sex-Dependent CBT Trends and Levels.** CBT Linear group means ( $\pm$  S.E.M.)  
597 in females (blue, A), and males (red, B). \* Indicates statistically significant MK trend during the bracketed time  
598 period. Phase of adolescence cutoffs (pre to mid, mid to late, and late to adult) are indicated by breaks in the  
599 colored x-axis at p42 and p58. Females exhibit a statistically significant upward trend in body temperature from pre  
600 to mid adolescence (A-C) ( $p=0.004$ ), and a downward trend in body temperature from mid to late adolescence (A)  
601 ( $p=0.019$ ). Violin plots of female and male temperatures across adolescence indicate that females exhibit wider  
602 ranging (\* in D-F indicates significant difference) and elevated temperatures compared to males (C, zoomed inset;  
603 D-F) ( $\chi^2= 25.37, 33.84, 25.52$ ;  $p=9.75*10^{-7}, 5.97*10^{-9}, 4.37*10^{-7}$  for pre to mid adolescence, mid to late adolescence,  
604 and late adolescence to early adulthood, respectively).

#### 605 Supplemental Figure Legends

606 **S1: External Pubertal Signs Differ in Time from Sex Steroid Rise.** Distribution of the day of life on which vaginal  
607 opening (top) or preputial separation (bottom) (A) versus rise in fE2 (top) and rise in fT (bottom) (B) illustrate that  
608 females' external and hormonal pubertal onset markers are more tightly coupled than in males. Scatter (C) of day of  
609 external marker versus day of hormonal rise  $>2$  S.D.

610 **S2: Male and Female Pubertal Weight Trajectory.** Plot of day of life and weight for females (blue gradient) and males  
611 (red gradient). Male and female weights differ statistically by the approximate time of female pubertal onset, p39  
612 ( $p=0.001$ ).

613

Supplemental Figure 1: External Pubertal Signs Differ in Time from Sex Steroid Rise

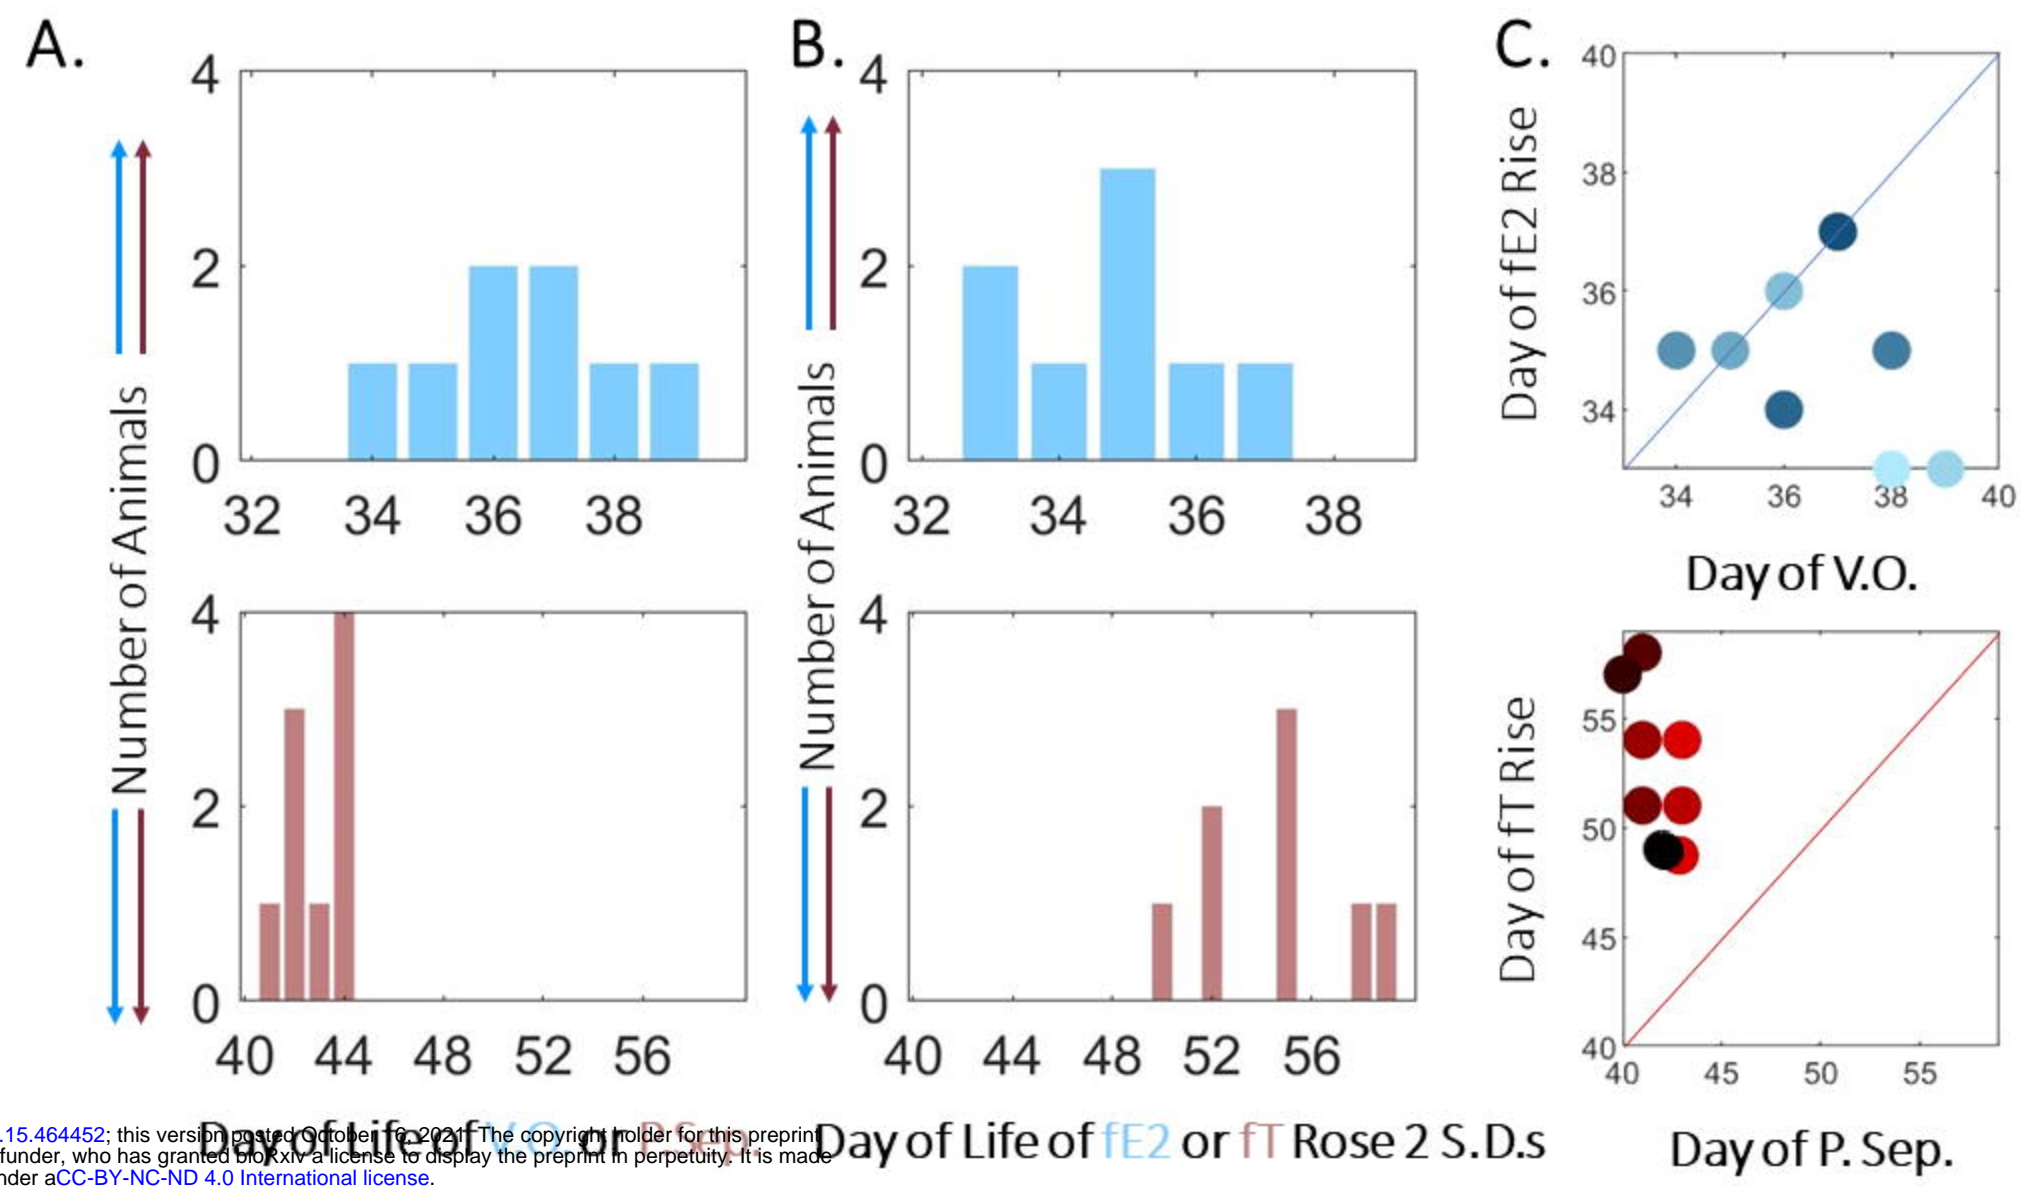

Supplemental Figure 2: Male and Female Pubertal Weight Trajectory

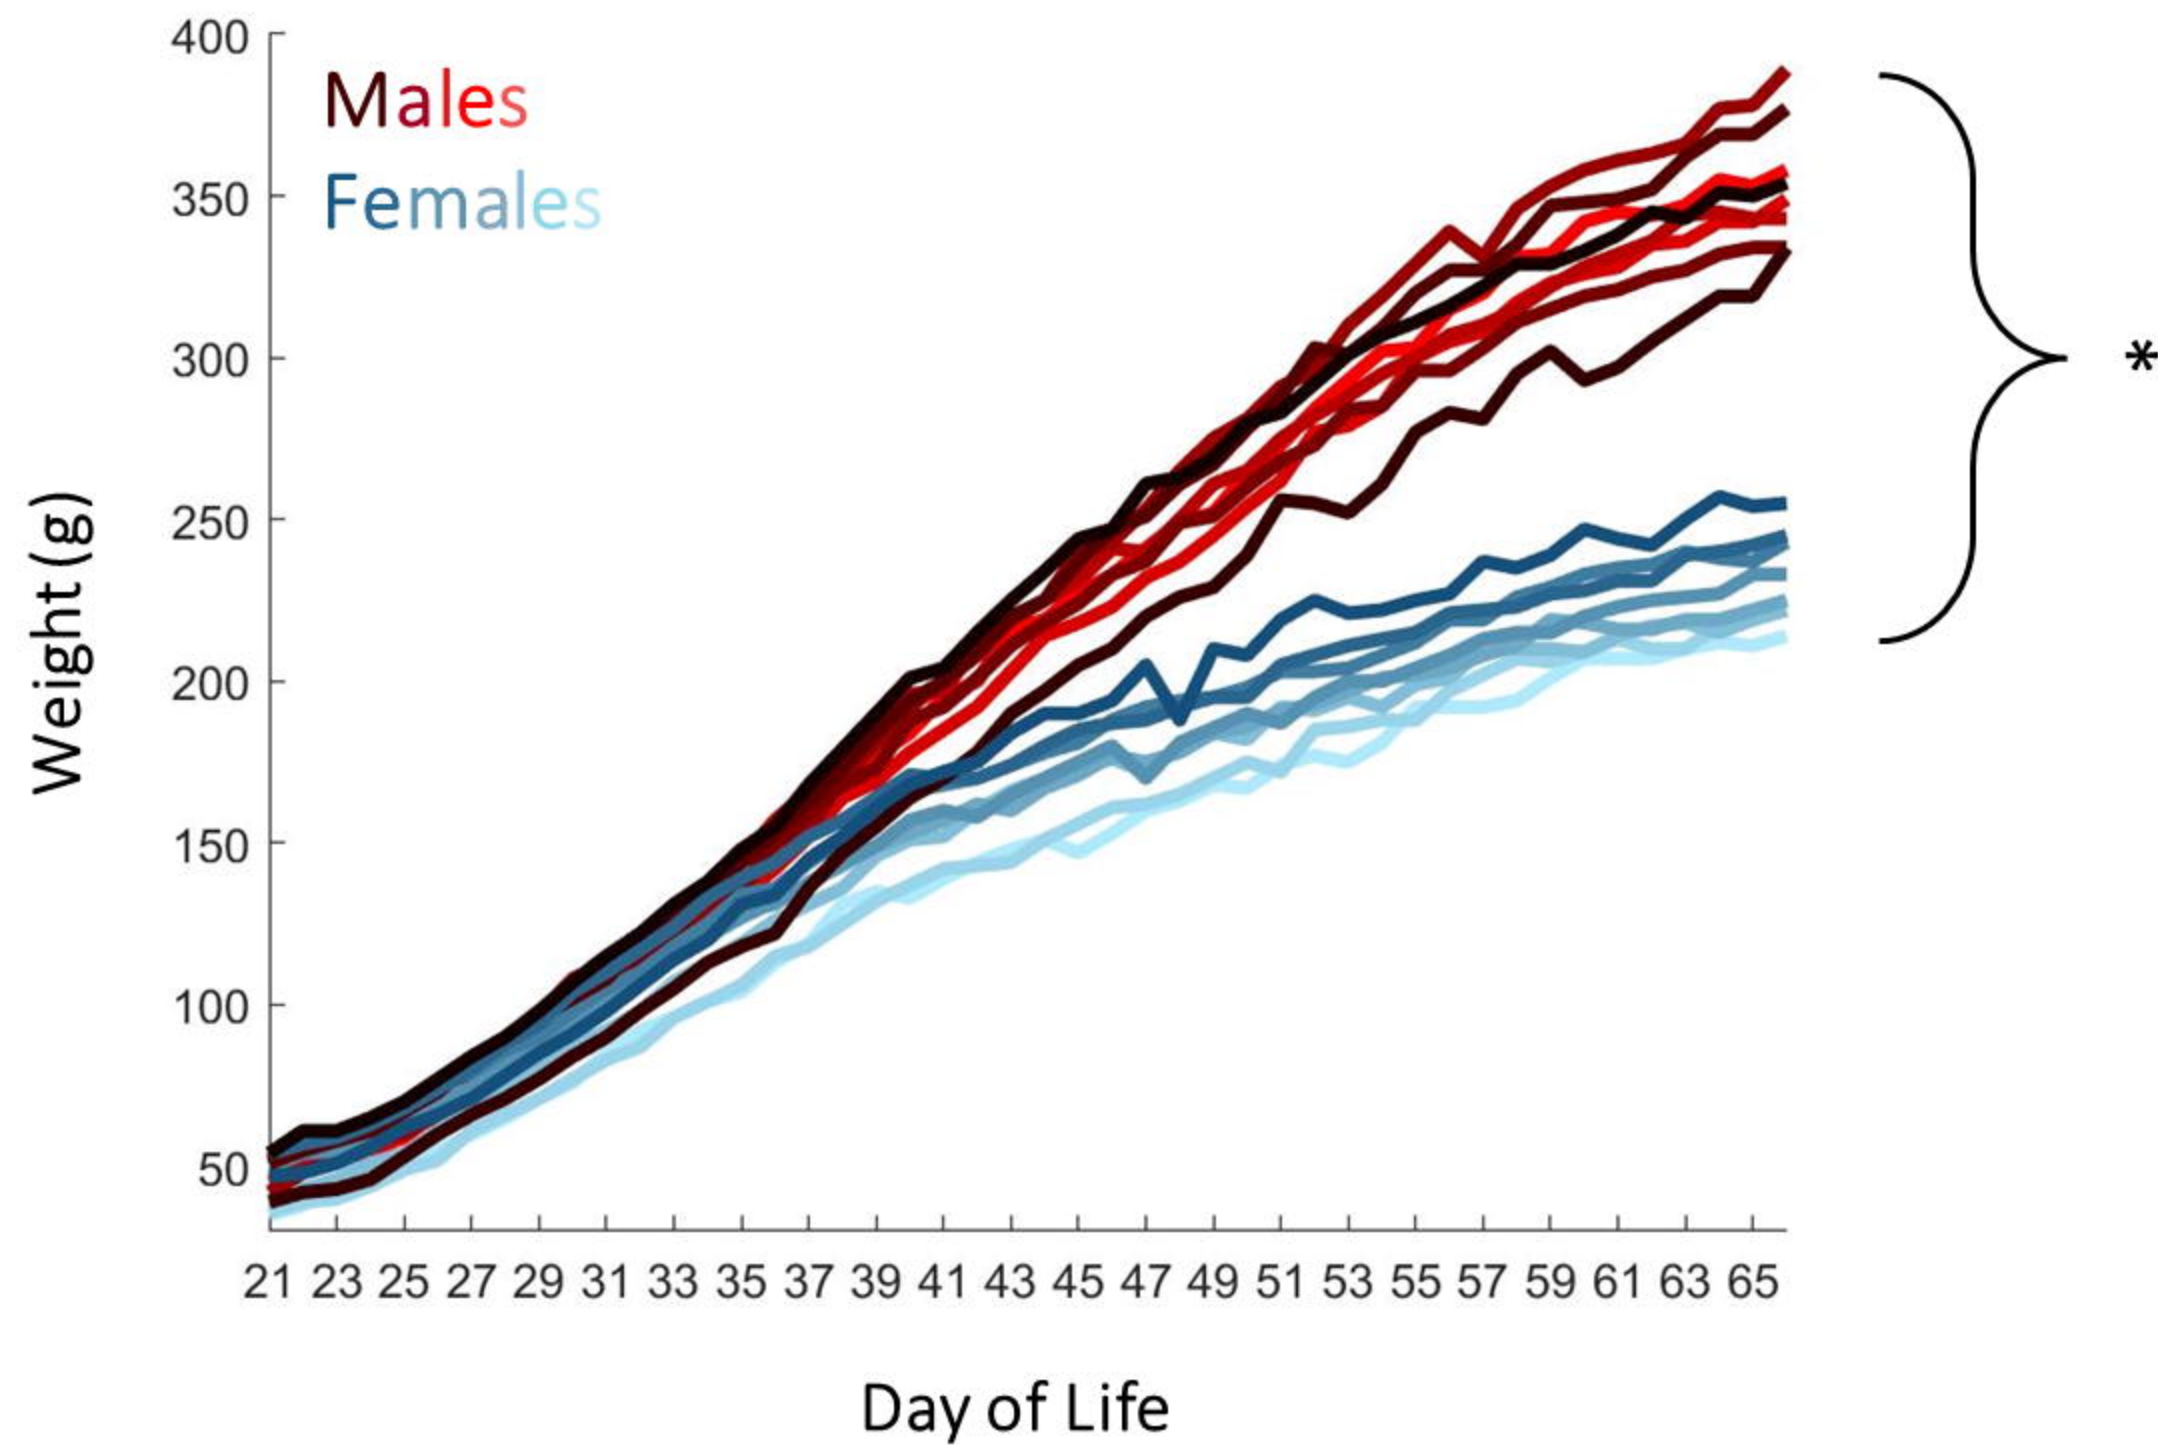



Figure 1. High Frequency Fecal Estradiol and Testosterone Enable Monitoring of Estrous Cycle Emergence and Pubertal Progression in Naturalistic Conditions

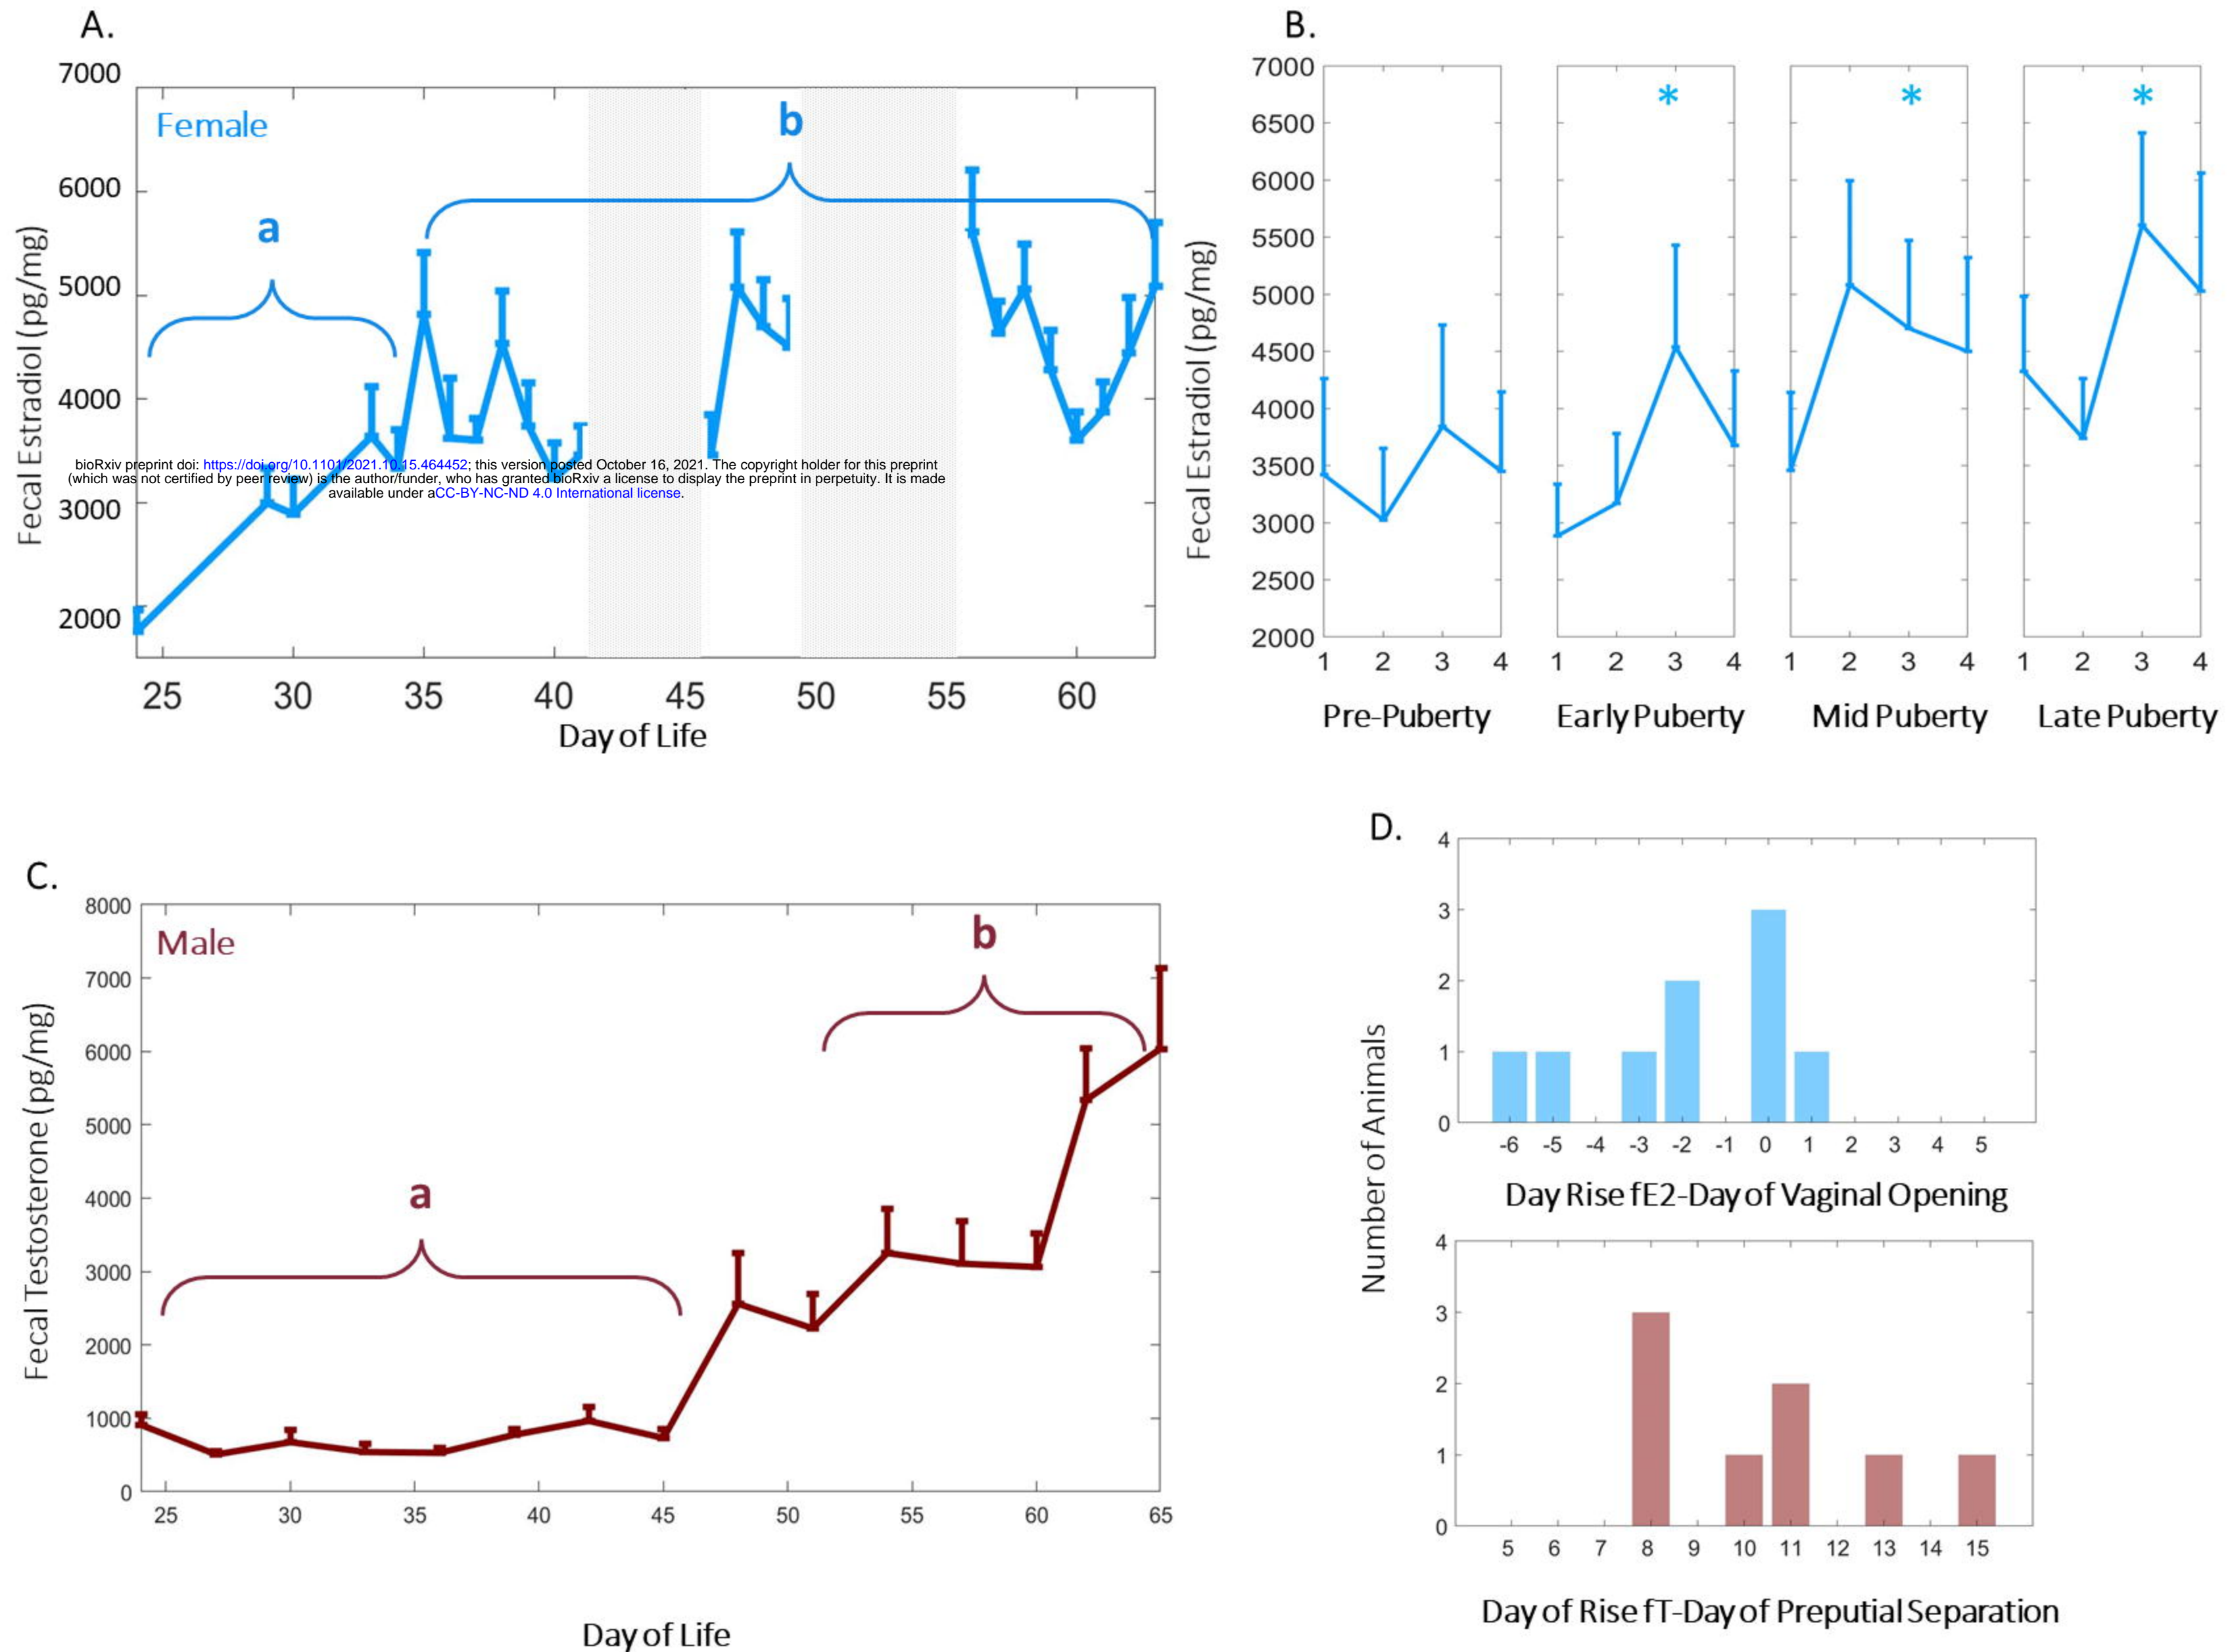



Figure 2. Sex Differences in Circadian Power and Correlation to Sex Steroids Predate and Are Maintained Through Adolescence.

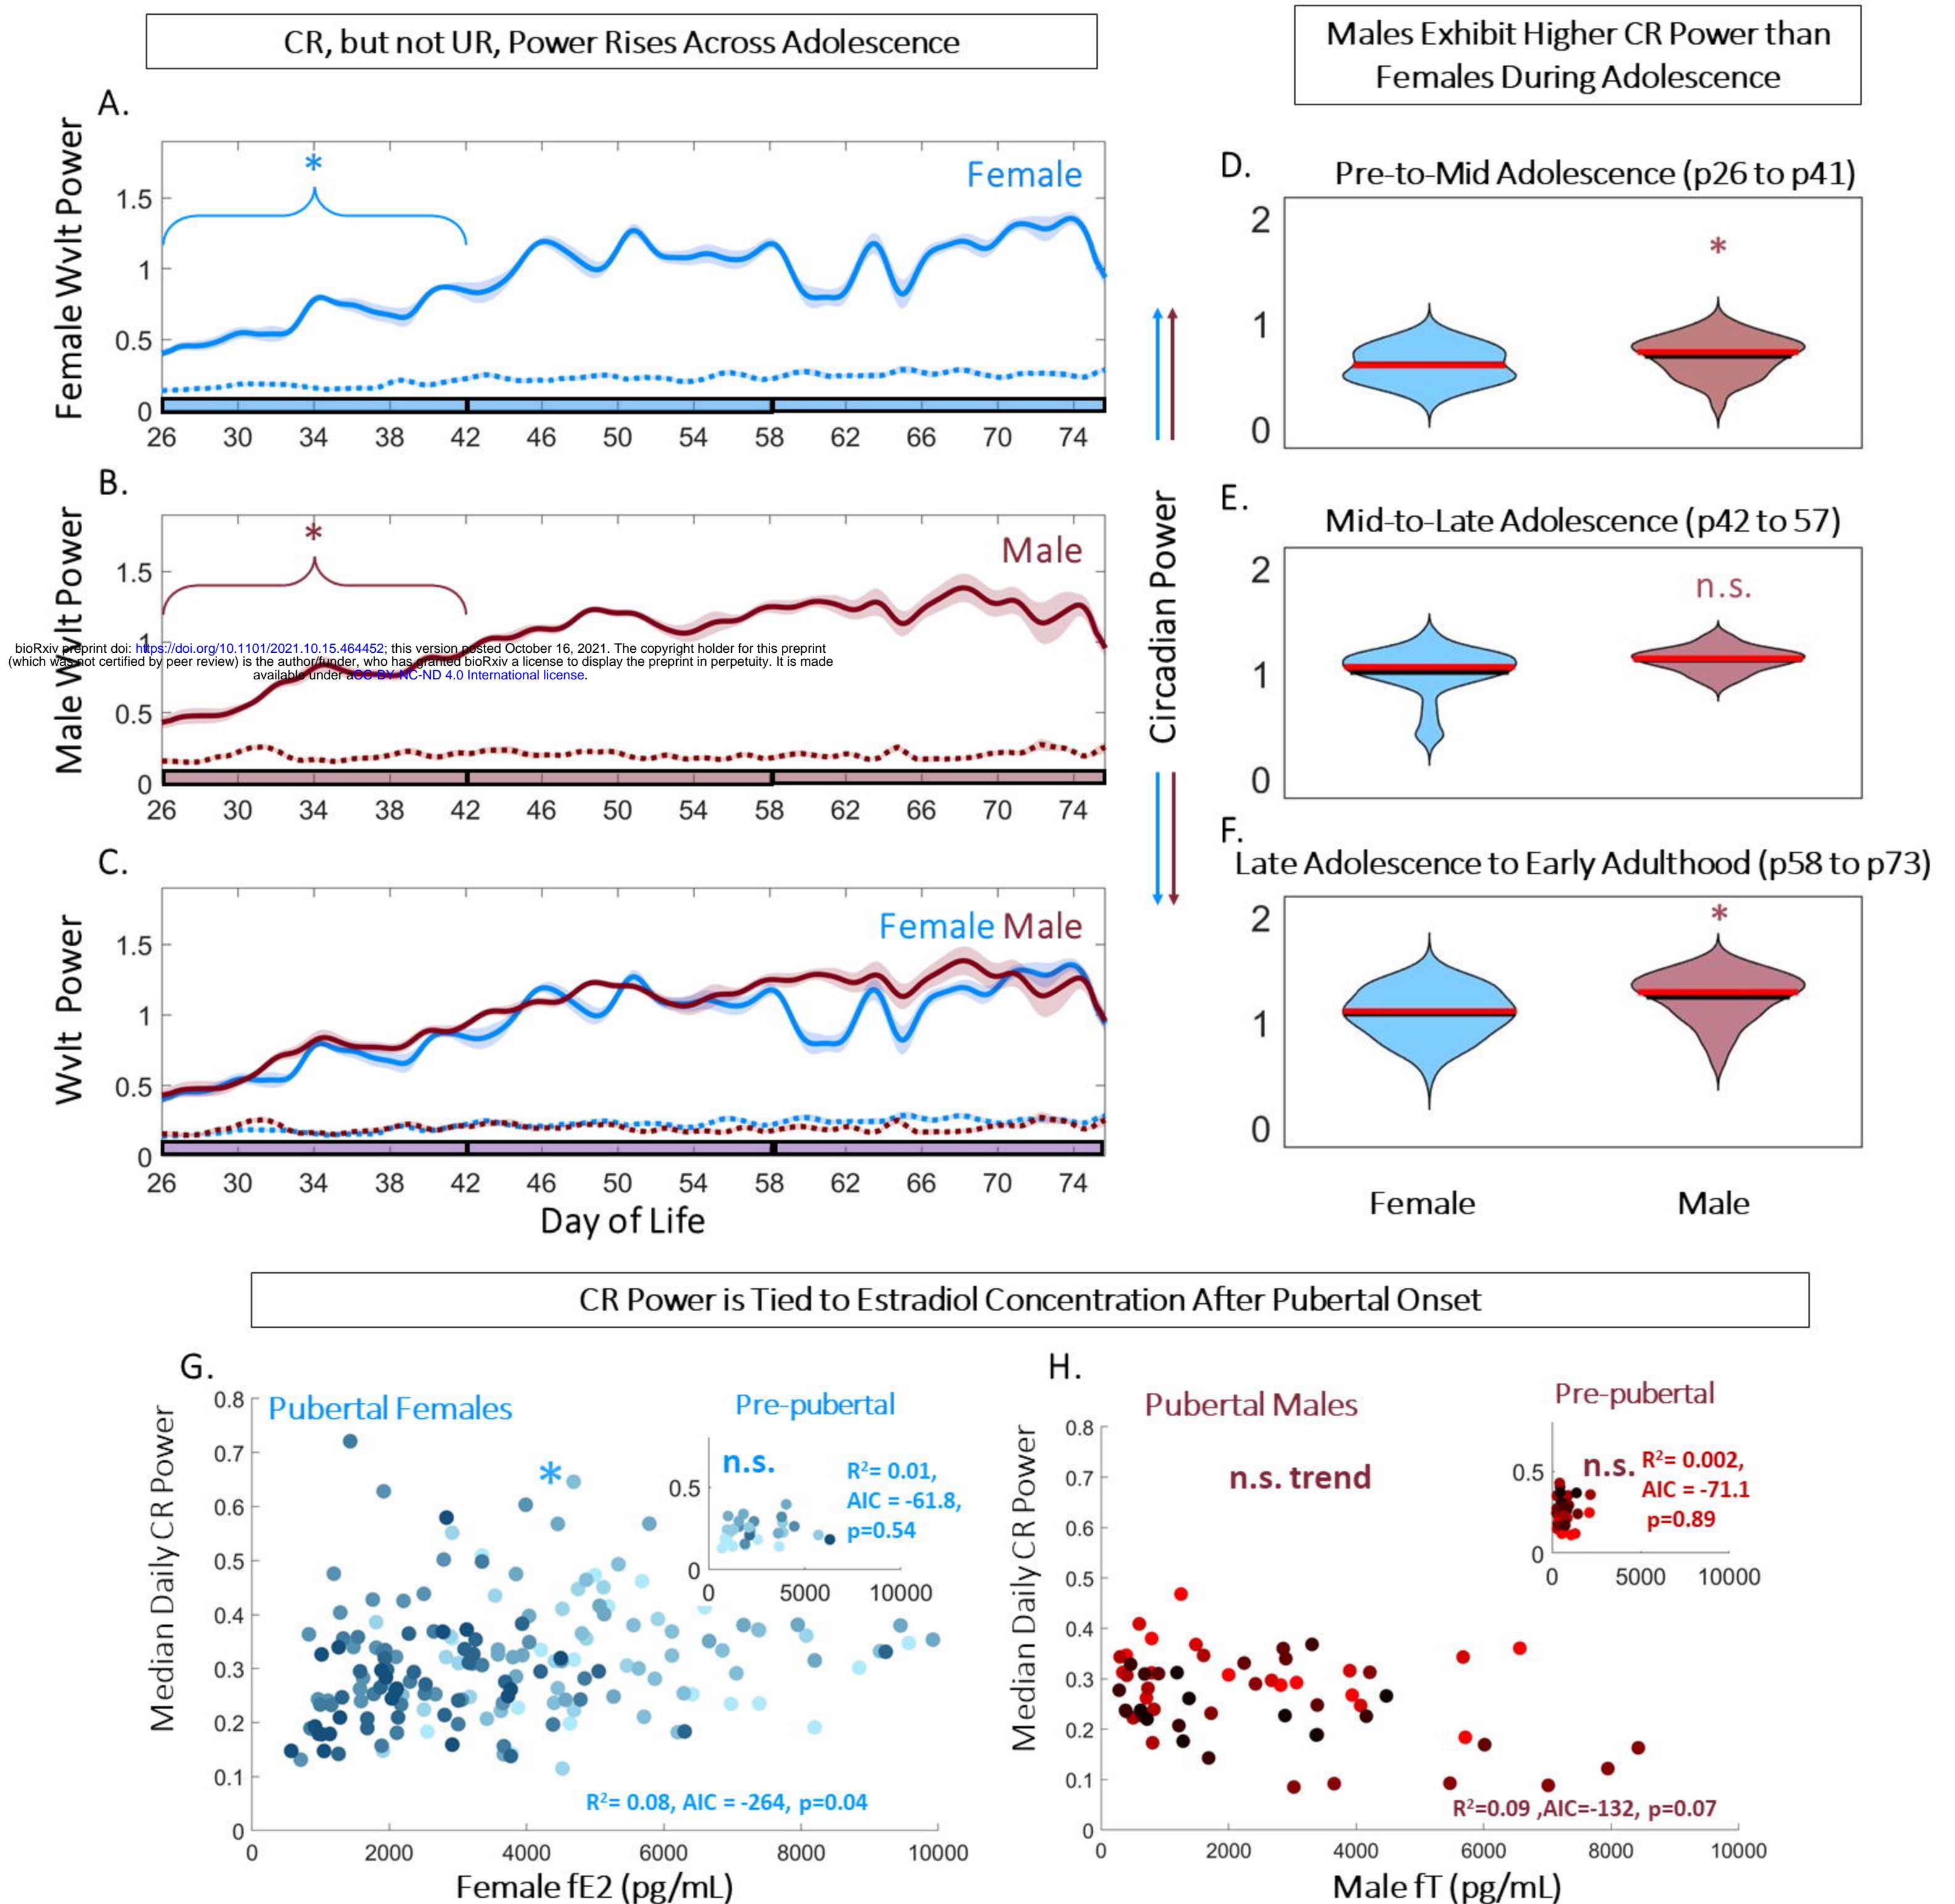



Figure 3. Temperature and Ultradian Power Track Ovulatory Cycles from Pubertal Onset

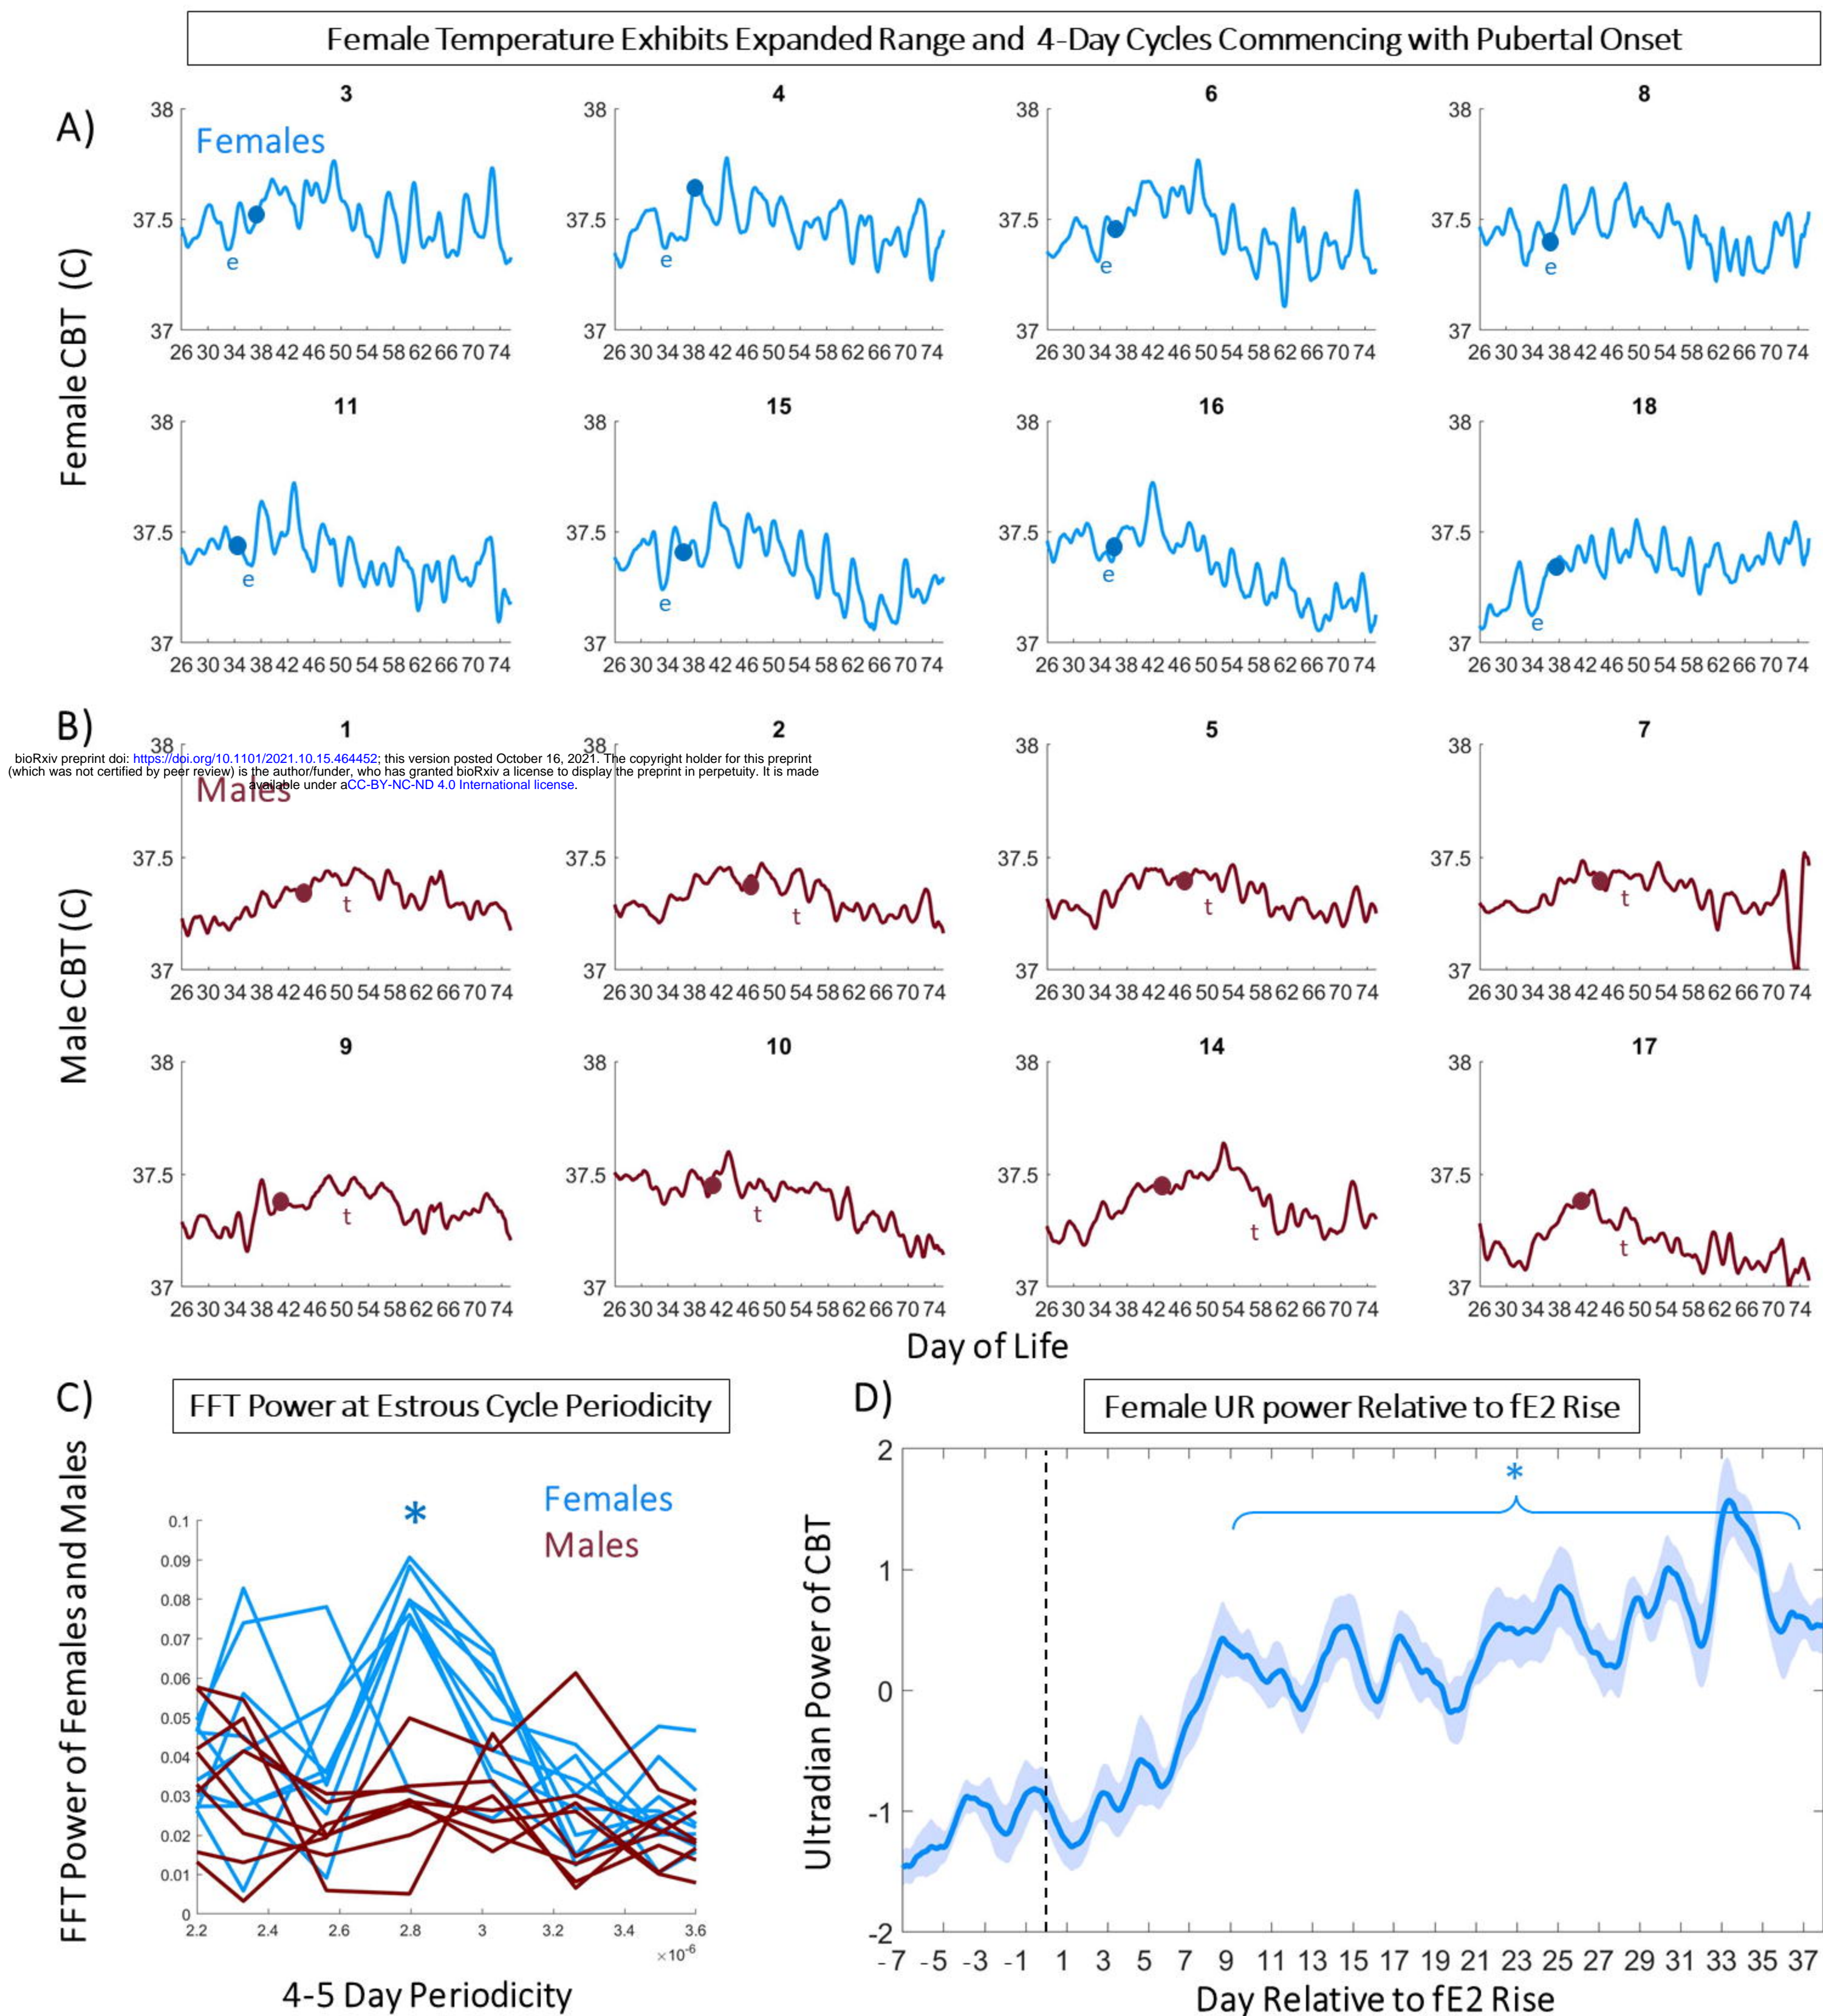



Figure 4. Adolescence is Associated with Sex-Dependent CBT Trends and Levels

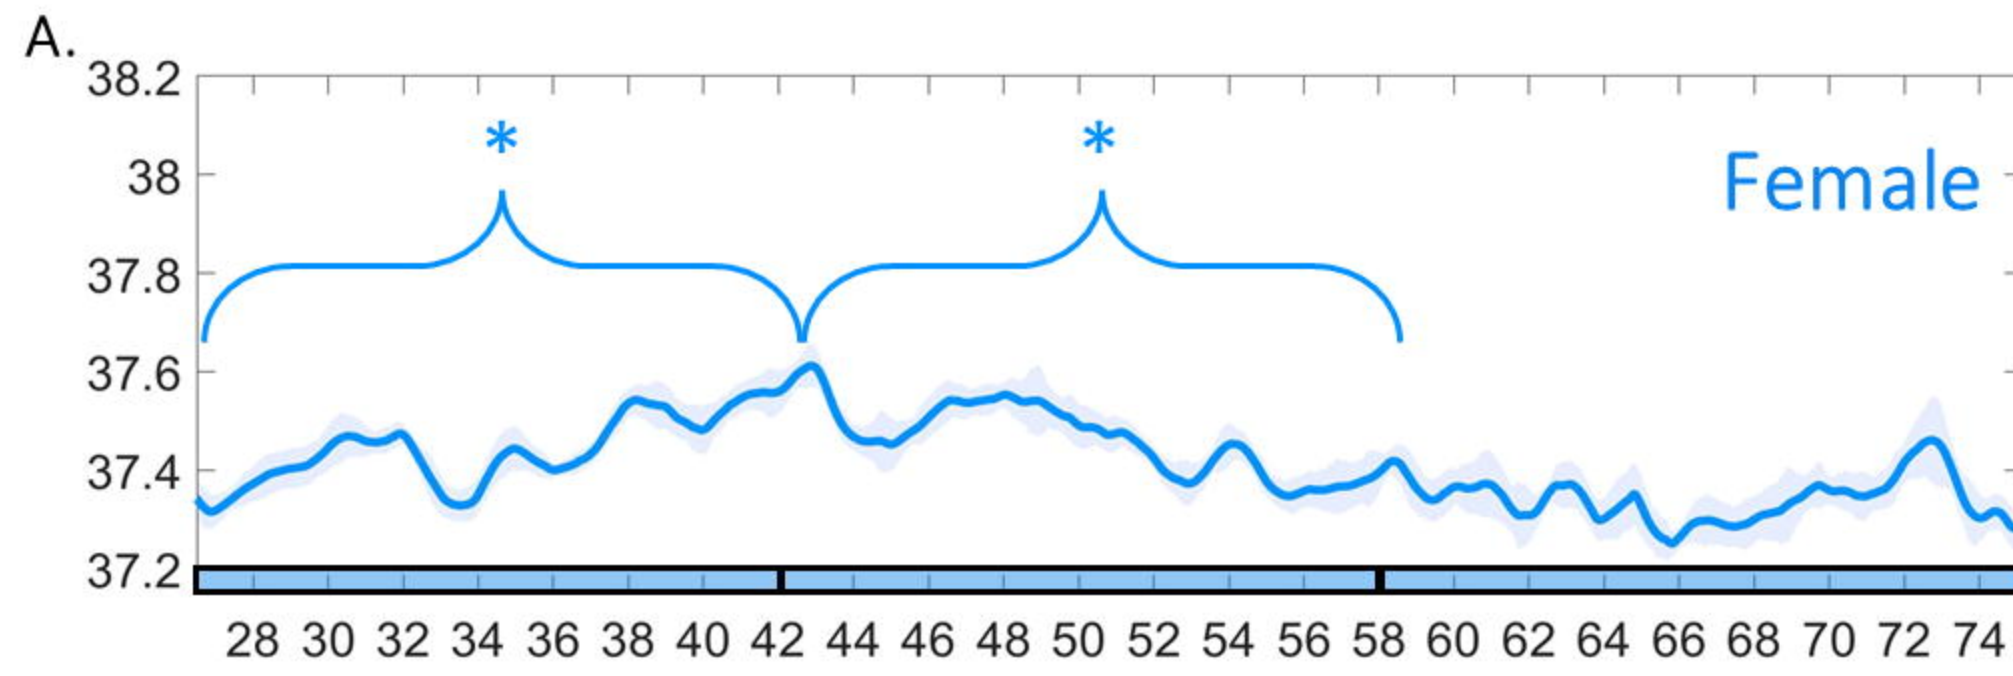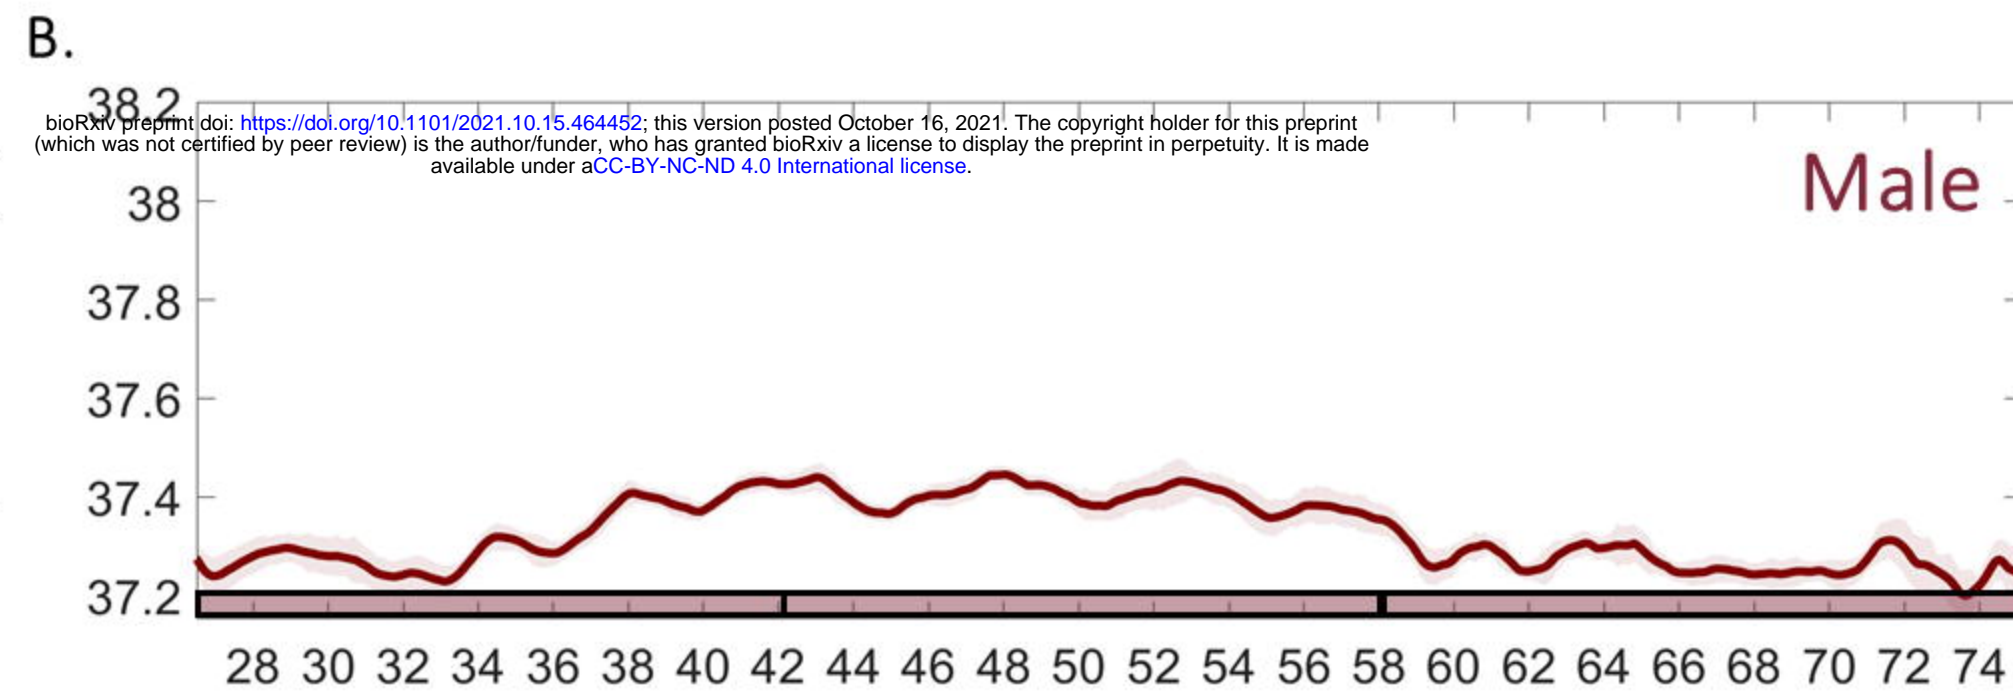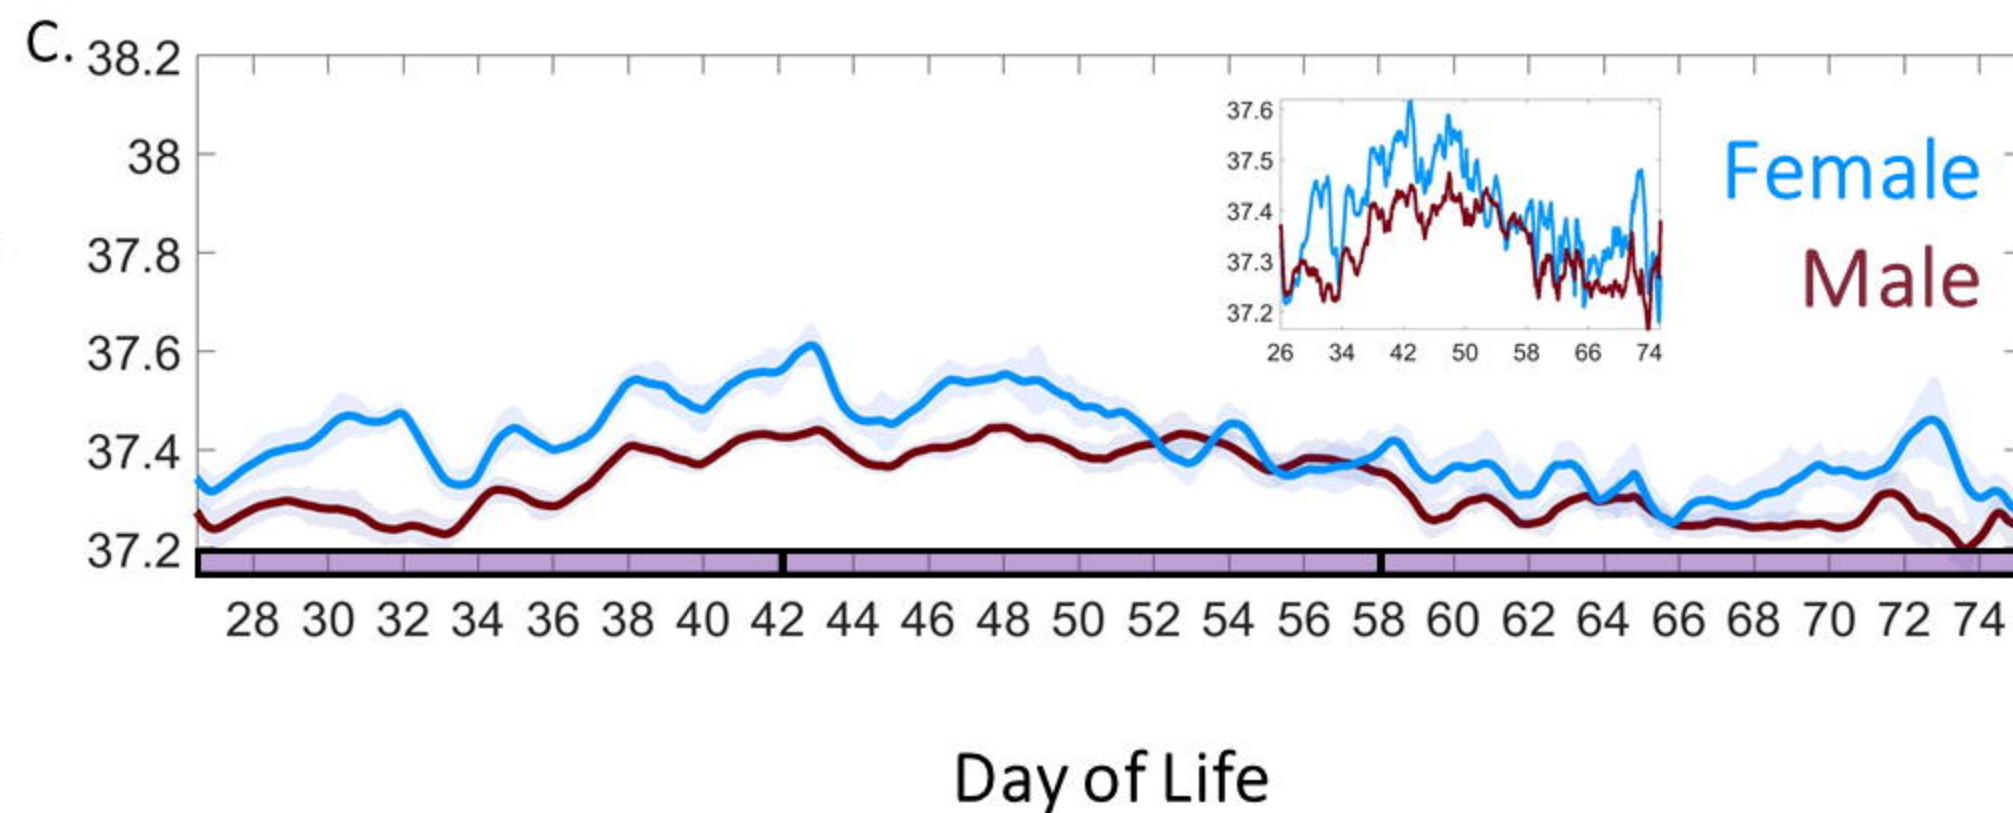

D. Pre to Mid Adolescence (p26 to p41)

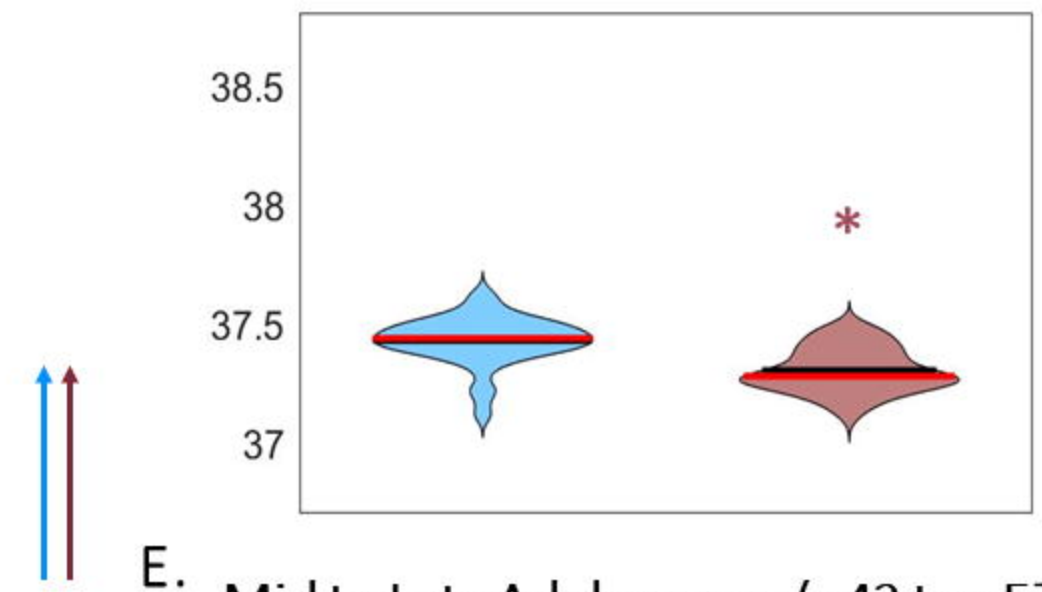

E. Mid to Late Adolescence (p42 to p57)

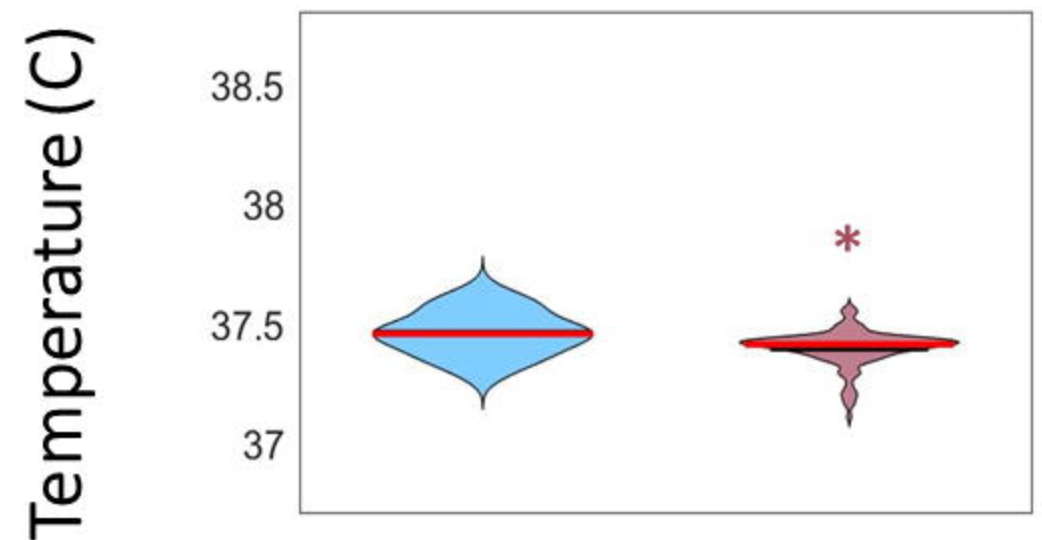

F. Late Adolescence to Early Adulthood (p58 to p73)

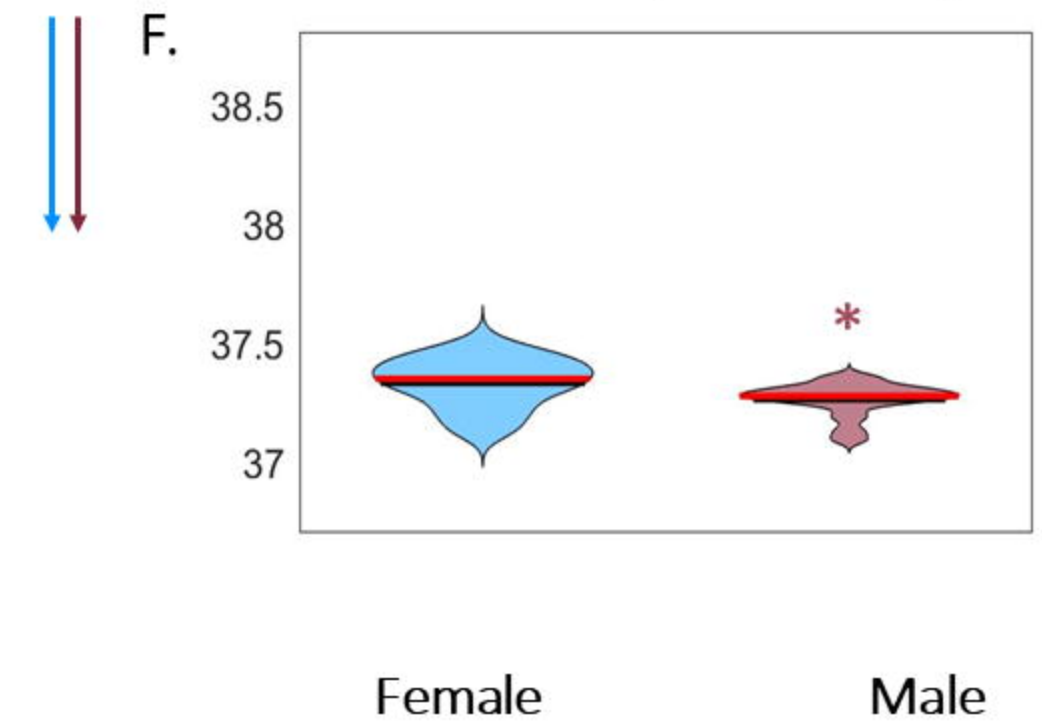

Source: https://www.biorxiv.org/content/10.1101/2021.10.15.464452v1.full.pdf
